# Supplementary material for: Benchmark study for evaluating the quality of reference genomes and gene annotations in 114 species
Source: Front Vet Sci. 2023 Feb 21;10:1128570. doi: 10.3389/fvets.2023.1128570 (PMC9988948; doi:10.3389/fvets.2023.1128570)
Supplement: Supplementary file 6 [file Table_5.XLSX]

## Sheet: Supplementary Table 5
Supplementary Table 5. Quality check results for paired-end RNA-sequencing 6,840 (3420 * 2) raw fastq files
SampleID	QC_Mean_of_mean_per_base_sequence (%)	QC_result_Mean_base_N (%)	Illumina_Universal_Adapter (%)	Raw_input_read
DRR084334_1	39.2988	0.00983373	0.0475638	10811031
DRR084334_2	38.1647	0.0119202	0.0903594	10811031
DRR084335_1	39.3071	0.00967265	0.0456269	11414565
DRR084335_2	38.3369	0.0118769	0.0856053	11414565
DRR084336_1	39.3142	0.0095605	0.0261419	10692573
DRR084336_2	38.0614	0.0118298	0.0623269	10692573
DRR084337_1	39.3316	0.0097983	0.0132896	10642849
DRR084337_2	38.154	0.0118877	0.0498824	10642849
DRR084338_1	39.3139	0.00955609	0.0173945	9945969
DRR084338_2	38.1976	0.0117974	0.0489679	9945969
DRR084339_1	39.34	0.00973713	0.0493597	9802590
DRR084339_2	38.3169	0.0118322	0.0856623	9802590
DRR084340_1	39.1897	0.0094479	0.0209787	10930370
DRR084340_2	37.9084	0.0117172	0.0607094	10930370
DRR084341_1	39.1906	0.00945372	0.0151938	10568995
DRR084341_2	37.9645	0.0117407	0.0525223	10568995
DRR084342_1	39.1784	0.00958984	0.0476234	10887374
DRR084342_2	37.8769	0.0117378	0.0892647	10887374
DRR084343_1	39.194	0.00956174	0.0457905	12017778
DRR084343_2	38.1191	0.0117951	0.0950878	12017778
DRR084344_1	39.2032	0.00951317	0.0587391	12552450
DRR084344_2	38.1678	0.0118262	0.102366	12552450
DRR084345_1	39.2084	0.00957777	0.0283096	11208054
DRR084345_2	38.0707	0.0117622	0.0699388	11208054
DRR099584_1	36.5241	0	1.17e-05	274590803
DRR099584_2	36.2985	0	1.71e-05	274590803
DRR100945_1	36.7506	0.00261507	0.0384171	17535458
DRR100945_2	35.9944	0.0296559	0.0372758	17535458
DRR100946_1	36.8286	0.00253582	0.0491844	11035715
DRR100946_2	36.0796	0.0289155	0.048675	11035715
DRR100947_1	36.9026	0.00254994	0.0240091	14546869
DRR100947_2	36.2105	0.0290314	0.023183	14546869
DRR100948_1	36.683	0.0025518	0.0356964	12957685
DRR100948_2	35.9803	0.0292435	0.0347551	12957685
DRR100949_1	36.8873	0.00256345	0.054054	12909112
DRR100949_2	36.1325	0.0289612	0.0527599	12909112
DRR100950_1	36.9012	0.0025444	0.0243134	10195308
DRR100950_2	36.2074	0.0287765	0.0238902	10195308
DRR100951_1	36.9089	0.00261229	0.0247525	8373014
DRR100951_2	36.0384	0.0296886	0.0238282	8373014
DRR100952_1	36.8321	0.00258269	0.0304758	10497844
DRR100952_2	36.0934	0.0292832	0.0295579	10497844
DRR100953_1	36.9497	0.00254271	0.0281101	9052271
DRR100953_2	36.3113	0.0290047	0.027087	9052271
DRR100954_1	36.8833	0.00261387	0.0402794	11241435
DRR100954_2	36.3007	0.0293337	0.0392923	11241435
DRR155078_1	35.5355	0.0374631	0.580943	25729075
DRR155078_2	35.1143	0.0152515	0.580989	25729075
DRR155079_1	35.4286	0.0377505	1.02766	26455757
DRR155079_2	35.0542	0.0151362	1.03088	26455757
DRR155080_1	35.5647	0.0379164	0.790045	28597597
DRR155080_2	35.0211	0.0150907	0.790895	28597597
DRR155081_1	35.5232	0.0372055	1.08188	26933200
DRR155081_2	34.9475	0.014575	1.08355	26933200
DRR155082_1	35.4412	0.0346047	1.09765	47232569
DRR155082_2	34.9414	0.0123016	1.10002	47232569
DRR155083_1	35.3841	0.0352169	0.333494	55640556
DRR155083_2	34.8091	0.0126078	0.334323	55640556
DRR155084_1	35.3707	0.0349222	0.783011	46900704
DRR155084_2	34.9814	0.0126734	0.784198	46900704
DRR155085_1	35.4243	0.0356106	0.623508	64654250
DRR155085_2	34.8494	0.0126806	0.624502	64654250
DRR155086_1	35.401	0.0381046	0.426143	100488573
DRR155086_2	34.6288	0.0153143	0.426079	100488573
DRR155087_1	36.651	0.00341201	0.901565	58690490
DRR155087_2	36.0762	0.00423347	0.89501	58690490
DRR155088_1	36.6045	0.0034163	0.960471	62852464
DRR155088_2	36.2096	0.00426472	0.953546	62852464
DRR155089_1	36.6746	0.00339495	0.582327	46215705
DRR155089_2	36.0539	0.0042387	0.577995	46215705
DRR155090_1	36.7157	0.00864469	0.982595	49937730
DRR155090_2	36.4126	0.0279131	0.974784	49937730
DRR155091_1	36.7359	0.00852711	0.697421	53226408
DRR155091_2	36.3709	0.0276426	0.69186	53226408
DRR155092_1	36.7382	0.00864757	0.777661	48531207
DRR155092_2	36.3391	0.027757	0.771304	48531207
DRR155093_1	36.7696	0.0104184	0.815514	49754682
DRR155093_2	36.4454	0.0222669	0.810792	49754682
DRR155094_1	36.8167	0.0104217	0.761204	50130308
DRR155094_2	36.4893	0.0221421	0.75661	50130308
DRR155095_1	36.773	0.0104855	0.740722	47463989
DRR155095_2	36.456	0.0222545	0.737027	47463989
DRR155096_1	36.8147	0.00779662	0.749591	45670038
DRR155096_2	36.315	0.0139716	0.744031	45670038
DRR155097_1	36.8048	0.00792064	0.807893	44371898
DRR155097_2	36.3706	0.0141427	0.80263	44371898
DRR155098_1	36.8205	0.00784129	0.952147	46818688
DRR155098_2	36.3696	0.0142667	0.946803	46818688
DRR169706_1	38.3022	0.0406964	0.264956	23904817
DRR169706_2	38.0798	0.0498576	0.29095	23904817
DRR169707_1	38.3076	0.0403529	0.280706	24326723
DRR169707_2	38.0857	0.0495511	0.307428	24326723
DRR169708_1	38.2856	0.0393672	0.252673	30220872
DRR169708_2	38.0939	0.0479462	0.282362	30220872
DRR169709_1	38.2295	0.0401584	0.270308	27364310
DRR169709_2	38.0033	0.0492779	0.298737	27364310
DRR169710_1	38.2366	0.0398087	0.173298	26455879
DRR169710_2	37.9849	0.0486724	0.202852	26455879
DRR169711_1	38.2365	0.040101	0.183824	29867405
DRR169711_2	37.9882	0.0490734	0.211622	29867405
DRR169712_1	38.2254	0.0396863	0.171503	25211673
DRR169712_2	37.9641	0.0486851	0.20212	25211673
DRR169713_1	38.2514	0.0402738	0.274124	28095768
DRR169713_2	38.0577	0.0493636	0.304806	28095768
DRR169714_1	38.2004	0.0384317	0.223944	20403451
DRR169714_2	37.9695	0.0470481	0.252966	20403451
DRR169715_1	38.209	0.0393846	0.182223	19683089
DRR169715_2	37.9513	0.0482818	0.209961	19683089
DRR169716_1	38.2576	0.0395801	0.175906	30334263
DRR169716_2	38.0347	0.0485424	0.200029	30334263
DRR169717_1	38.0951	0.0371454	0.110737	23493548
DRR169717_2	37.8156	0.045588	0.139711	23493548
DRR169718_1	38.741	0.00654155	7.79371	23119913
DRR169718_2	38.0104	0.00334785	7.70264	23119913
DRR169719_1	38.5737	0.00724311	8.71073	21177450
DRR169719_2	37.6726	0.00282217	8.57879	21177450
DRR169720_1	38.549	0.00705751	7.82985	21293468
DRR169720_2	37.584	0.00291154	7.72707	21293468
DRR205463_1	36.1569	0.000111603	0.00269421	59029836
DRR205463_2	35.9864	7.67e-05	0.00254269	59029836
DRR205464_1	36.1265	0.000108634	0.00290393	55187572
DRR205464_2	35.9485	7.03e-05	0.00285374	55187572
DRR205465_1	36.0841	0.000103381	0.00263343	48451369
DRR205465_2	35.675	6.83e-05	0.00266382	48451369
DRR205466_1	36.1035	0.000101932	0.00264171	51510245
DRR205466_2	36.0649	7.41e-05	0.00250794	51510245
DRR205467_1	36.1144	0.000107703	0.00262734	60062841
DRR205467_2	35.9534	7.43e-05	0.00250294	60062841
DRR205468_1	36.1473	0.000109869	0.00234885	62150676
DRR205468_2	35.9143	7.04e-05	0.00241311	62150676
DRR205469_1	36.1382	0.000104069	0.00223979	50078310
DRR205469_2	36.085	7.35e-05	0.00197477	50078310
DRR207799_1	36.0918	0.000962135	0.145753	77516185
DRR207799_2	35.9616	0.00130203	0.145082	77516185
DRR207800_1	36.0885	0.000973429	0.119054	81910690
DRR207800_2	36.0929	0.00129367	0.120373	81910690
DRR207801_1	36.0694	0.000937494	0.0947523	82969233
DRR207801_2	35.9933	0.00125981	0.094716	82969233
DRR207802_1	36.1223	0.000969423	0.126278	81505334
DRR207802_2	36.1738	0.00130485	0.126986	81505334
DRR207803_1	36.0808	0.000949114	0.119292	77200006
DRR207803_2	35.9643	0.00127291	0.120251	77200006
DRR207804_1	36.0907	0.000968075	0.112865	83056335
DRR207804_2	35.8969	0.00130833	0.113106	83056335
DRR219741_1	38.6306	0.00531639	2.78116	26313452
DRR219741_2	38.3885	0.0207206	2.76475	26313452
DRR219742_1	38.6265	0.00532079	2.82057	27035753
DRR219742_2	38.258	0.0210323	2.78726	27035753
DRR219743_1	38.6543	0.00528041	2.79476	26203966
DRR219743_2	38.3405	0.0207015	2.77665	26203966
DRR219744_1	38.8007	0.0109405	3.52404	22772652
DRR219744_2	38.6187	0.014345	3.50234	22772652
DRR219745_1	38.8131	0.0109059	2.94556	20894155
DRR219745_2	38.5627	0.0143273	2.92662	20894155
DRR219746_1	38.8329	0.0108816	3.01232	23485205
DRR219746_2	38.663	0.014318	2.99035	23485205
DRR219747_1	38.8074	0.0109192	2.94949	23047784
DRR219747_2	38.4528	0.0145251	2.91188	23047784
DRR219748_1	38.7778	0.0108732	2.9041	23854745
DRR219748_2	38.4957	0.0142755	2.87605	23854745
DRR219749_1	38.7138	0.0108751	3.25699	21798294
DRR219749_2	38.4116	0.014072	3.2362	21798294
DRR219750_1	35.9774	0.00391239	1.81025	33085869
DRR219750_2	35.7285	0.00922437	1.79413	33085869
DRR219751_1	35.9802	0.00386263	1.60253	31627701
DRR219751_2	35.7547	0.0095001	1.58623	31627701
DRR219752_1	36.0376	0.00395104	3.89897	33865098
DRR219752_2	35.8664	0.00935917	3.86874	33865098
DRR219753_1	35.9768	0.00383805	1.51474	31784126
DRR219753_2	35.6903	0.00949225	1.49201	31784126
DRR219754_1	35.9367	0.00384837	1.35453	33643164
DRR219754_2	35.7137	0.00931157	1.33889	33643164
DRR219755_1	35.7356	0.00383426	1.53269	31251559
DRR219755_2	35.6651	0.00937537	1.51535	31251559
DRR219756_1	35.9936	0.0042844	1.74281	28800475
DRR219756_2	35.7893	0.0126252	1.73702	28800475
DRR231328_1	36.5593	0.0736203	3.6e-05	23267758
DRR231328_2	36.1742	0.324952	6.63e-05	23267758
DRR231329_1	36.5518	0.0736423	2.46e-05	20858173
DRR231329_2	36.1348	0.320161	7.04e-05	20858173
DRR231330_1	36.5393	0.0745414	3.71e-05	19008010
DRR231330_2	36.1231	0.320068	0.000101139	19008010
DRR231331_1	36.5777	0.0739707	2.84e-05	18239248
DRR231331_2	36.1457	0.32296	0.000114185	18239248
DRR231332_1	36.5433	0.0744827	3.96e-05	19688148
DRR231332_2	36.1773	0.324462	8.39e-05	19688148
DRR231333_1	36.5435	0.0732594	4.18e-05	20844729
DRR231333_2	36.1424	0.3229	6.44e-05	20844729
DRR231334_1	36.5608	0.0740552	4.22e-05	21471348
DRR231334_2	36.1351	0.32158	8.34e-05	21471348
DRR231335_1	36.4936	0.0738238	1.83e-05	23596457
DRR231335_2	36.0692	0.32286	5.88e-05	23596457
DRR231336_1	36.5017	0.0739554	2e-05	19864138
DRR231336_2	36.1155	0.323077	8.03e-05	19864138
DRR231337_1	36.5555	0.0739405	3.25e-05	20801231
DRR231337_2	36.1412	0.322518	9.57e-05	20801231
DRR231338_1	36.5306	0.0741352	3.17e-05	19809807
DRR231338_2	36.1749	0.32466	7.26e-05	19809807
DRR231339_1	36.549	0.0739434	3.05e-05	17607378
DRR231339_2	36.2039	0.324289	7.7e-05	17607378
DRR231340_1	36.5529	0.0745095	2.88e-05	19506299
DRR231340_2	36.1271	0.323145	9.48e-05	19506299
DRR231341_1	36.5585	0.0735782	3.91e-05	19816618
DRR231341_2	36.1719	0.323523	6.86e-05	19816618
DRR231342_1	36.5503	0.0744504	2.41e-05	21569652
DRR231342_2	36.1298	0.324168	5.6e-05	21569652
DRR231343_1	36.5457	0.0734575	2.56e-05	21566289
DRR231343_2	36.1401	0.323426	7.68e-05	21566289
DRR239066_1	35.9366	0.00232043	6.64874	45489619
DRR239066_2	35.7205	0.000253048	6.6851	45489619
DRR239067_1	35.9173	0.00234269	6.76499	40442760
DRR239067_2	35.7218	0.000249892	6.79513	40442760
DRR239068_1	35.9209	0.00232367	7.08726	32320194
DRR239068_2	35.6789	0.000247002	7.12348	32320194
DRR239069_1	35.933	0.00232737	6.92908	31468271
DRR239069_2	35.8229	0.000251498	6.99921	31468271
DRR248925_1	36.3891	0.00109546	0.0155003	31301819
DRR248925_2	36.1516	6.63e-05	0.0156337	31301819
DRR248926_1	36.3615	0.00235806	0.0111299	22484949
DRR248926_2	36.0079	0.0034453	0.0114096	22484949
DRR248927_1	36.3594	0.00239839	0.009347	20202212
DRR248927_2	35.9379	0.00344409	0.00919147	20202212
DRR248928_1	36.3808	0.00110245	0.0137476	28771398
DRR248928_2	36.2137	7.15e-05	0.0134223	28771398
DRR248929_1	36.3876	0.00110781	0.0117563	31463454
DRR248929_2	36.1857	6.51e-05	0.0116821	31463454
DRR248930_1	36.3493	0.00238837	0.00745721	22692928
DRR248930_2	35.857	0.00344465	0.00737005	22692928
DRR248931_1	36.3862	0.0023652	0.0118758	23326089
DRR248931_2	35.9946	0.00339643	0.0121954	23326089
DRR248932_1	36.3678	0.00109857	0.0213088	31340634
DRR248932_2	36.1629	6.7e-05	0.0212152	31340634
DRR248933_1	36.3898	0.00109909	0.0113464	31236652
DRR248933_2	36.2426	6.79e-05	0.0112763	31236652
DRR248934_1	36.4113	0.00110924	0.0176781	31433467
DRR248934_2	36.293	6.57e-05	0.0177786	31433467
DRR248935_1	36.3186	0.00468942	0.0166304	25675609
DRR248935_2	35.9081	0.00341244	0.0165704	25675609
DRR248936_1	36.407	0.00111436	0.0153672	24398893
DRR248936_2	36.2244	6.63e-05	0.0151083	24398893
DRR248937_1	36.2479	0.00471664	0.010189	31486784
DRR248937_2	36.0634	0.00341347	0.0106059	31486784
DRR248938_1	36.3809	0.00112007	0.0187384	25049500
DRR248938_2	36.1349	6.53e-05	0.0185315	25049500
DRR276701_1	36.3143	0.000491312	0.0258822	22733187
DRR276701_2	36.1002	8.52e-05	0.0264659	22733187
DRR276702_1	36.3068	0.000505461	0.0225663	23141795
DRR276702_2	35.9479	8.59e-05	0.0227639	23141795
DRR276703_1	36.3123	0.000529344	0.027283	21991201
DRR276703_2	36.1141	8.51e-05	0.0277894	21991201
DRR276704_1	36.3126	0.000535263	0.0416872	22172598
DRR276704_2	36.192	9.57e-05	0.0422024	22172598
DRR276705_1	36.32	0.000525929	0.0328082	27068968
DRR276705_2	36.108	9.09e-05	0.0328022	27068968
DRR276706_1	36.3171	0.000516605	0.0295983	22610897
DRR276706_2	36.1353	9.09e-05	0.0303491	22610897
DRR276707_1	36.3175	0.000506272	0.0279071	26699650
DRR276707_2	36.1317	8.66e-05	0.0288164	26699650
DRR276708_1	36.2458	0.00050395	0.0278584	27190662
DRR276708_2	36.0778	8.95e-05	0.0284767	27190662
DRR276709_1	36.2923	0.000531904	0.0327426	22972360
DRR276709_2	36.107	9.23e-05	0.03334	22972360
DRR276710_1	36.2833	0.000498083	0.0228986	22595710
DRR276710_2	36.0162	9.33e-05	0.0231802	22595710
DRR276711_1	36.3532	0.000515665	0.0248087	27925096
DRR276711_2	36.0524	8.8e-05	0.0253242	27925096
DRR276712_1	36.3264	0.000498463	0.0313919	24739677
DRR276712_2	35.9954	8.79e-05	0.0321901	24739677
DRR276713_1	36.3191	0.000510182	0.0297829	30179976
DRR276713_2	35.9786	9.02e-05	0.030396	30179976
DRR276714_1	36.295	0.000501961	0.0245604	24219573
DRR276714_2	36.0978	8.7e-05	0.0254669	24219573
DRR276715_1	36.2954	0.000501534	0.0216435	26355485
DRR276715_2	35.9613	8.72e-05	0.0224017	26355485
DRR276716_1	36.316	0.000529417	0.0240778	21084960
DRR276716_2	36.1057	9.71e-05	0.0252052	21084960
DRR276717_1	36.2476	0.000501703	0.0287362	24161342
DRR276717_2	36.1409	8.26e-05	0.0293814	24161342
DRR276718_1	36.294	0.000514796	0.03125	22579127
DRR276718_2	36.0806	9.32e-05	0.0318049	22579127
DRR276719_1	36.3118	0.000503086	0.0231288	26736795
DRR276719_2	36.0804	8.97e-05	0.0236366	26736795
DRR276720_1	36.3025	0.00051401	0.0264245	22289992
DRR276720_2	36.1173	9.29e-05	0.0276167	22289992
DRR276721_1	36.3469	0.000508629	0.0249196	28059386
DRR276721_2	36.1821	8.86e-05	0.0258973	28059386
DRR276722_1	36.2992	0.000498299	0.0214016	21380000
DRR276722_2	36.1278	9.12e-05	0.0219877	21380000
DRR276723_1	36.3192	0.000514213	0.0257192	23064360
DRR276723_2	36.1053	8.87e-05	0.0264708	23064360
DRR276724_1	36.3118	0.000502835	0.0432887	20538113
DRR276724_2	36.1283	8.62e-05	0.0439126	20538113
DRR284958_1	34.5594	0.000138248	0	23214742
DRR284958_2	34.3532	3.96e-05	0	23214742
DRR284959_1	34.5394	0.00014256	0	26637379
DRR284959_2	34.3697	3.95e-05	0	26637379
DRR284960_1	34.5421	0.000140905	0	21206169
DRR284960_2	34.3015	3.79e-05	0	21206169
DRR284961_1	34.5474	0.00013857	0	23959540
DRR284961_2	34.3663	3.99e-05	0	23959540
DRR284962_1	34.5545	0.00014027	0	18973190
DRR284962_2	34.2768	3.92e-05	0	18973190
DRR284963_1	34.531	0.000134232	0	18416217
DRR284963_2	34.3605	3.91e-05	0	18416217
DRR284964_1	34.4933	0.000142302	0	13042853
DRR284964_2	34.3164	4.09e-05	0	13042853
DRR284965_1	34.5427	0.00013838	0	19473362
DRR284965_2	34.3688	3.92e-05	0	19473362
DRR284966_1	34.5681	0.0001402	0	21522034
DRR284966_2	34.3121	3.98e-05	0	21522034
DRR284967_1	34.5562	0.000135986	0	20855531
DRR284967_2	34.3721	3.75e-05	0	20855531
DRR284968_1	34.5217	0.000135145	0	24754132
DRR284968_2	34.3239	3.89e-05	0	24754132
DRR284969_1	34.5633	0.000146356	0	21573431
DRR284969_2	34.3275	3.73e-05	0	21573431
DRR284970_1	34.5523	0.000147504	0	21947764
DRR284970_2	34.3319	3.86e-05	0	21947764
DRR284971_1	34.5437	0.000139636	0	25361543
DRR284971_2	34.3292	4.02e-05	0	25361543
DRR284972_1	34.5259	0.000140887	0	23915556
DRR284972_2	34.3156	3.79e-05	0	23915556
DRR284973_1	34.5287	0.000143411	0	19357385
DRR284973_2	34.3636	4.24e-05	0	19357385
DRR284974_1	34.576	0.000146635	0	19995707
DRR284974_2	34.3482	3.77e-05	0	19995707
DRR284975_1	34.5348	0.000142327	0	18773971
DRR284975_2	34.2891	4.09e-05	0	18773971
DRR299990_1	39.5994	0.00269111	0.509273	35480435
DRR299990_2	39.2151	0.00469954	0.504629	35480435
DRR299991_1	39.59	0.002677	0.199036	36487920
DRR299991_2	39.1065	0.00472042	0.198096	36487920
DRR299992_1	39.3301	0.0117047	0.0832265	31638834
DRR299992_2	37.8437	0.0069827	0.0863578	31638834
DRR299993_1	39.5821	0.00535778	0.158164	36643937
DRR299993_2	39.0394	0.00524753	0.157662	36643937
DRR299994_1	39.6136	0.00266389	0.0800148	43479848
DRR299994_2	39.1446	0.00469881	0.0815099	43479848
DRR299995_1	39.4736	0.00292171	0.0898095	38022270
DRR299995_2	38.5585	0.0244745	0.088904	38022270
DRR299996_1	39.3364	0.00296585	0.0964028	51079915
DRR299996_2	38.7646	0.0248414	0.0957767	51079915
DRR299997_1	39.3228	0.00298721	0.095262	34320006
DRR299997_2	38.6031	0.0249283	0.0946717	34320006
DRR299998_1	39.3301	0.00304947	0.171314	44390107
DRR299998_2	38.7822	0.0250604	0.169975	44390107
DRR299999_1	39.3664	0.00297989	0.176372	49075078
DRR299999_2	38.7942	0.0248768	0.174694	49075078
DRR300000_1	39.3645	0.00304391	0.212447	53801091
DRR300000_2	38.8022	0.0249846	0.210557	53801091
DRR300001_1	39.3552	0.00302261	0.149426	44740339
DRR300001_2	38.8131	0.0248821	0.147993	44740339
DRR300002_1	39.5193	0.00288527	0.143124	45762926
DRR300002_2	38.8228	0.0243309	0.141685	45762926
DRR300003_1	39.4702	0.00289095	0.0807545	44256631
DRR300003_2	38.7616	0.0243705	0.0802743	44256631
DRR300004_1	39.3413	0.0117506	0.0712945	30914010
DRR300004_2	37.8093	0.00698771	0.0722156	30914010
DRR300005_1	39.3605	0.0114287	0.06807	34513479
DRR300005_2	37.9747	0.00688137	0.0697509	34513479
DRR300006_1	39.5133	0.00731023	0.204602	41150546
DRR300006_2	38.6135	0.0187731	0.203906	41150546
DRR300007_1	39.4918	0.00291586	0.138509	32356854
DRR300007_2	38.8008	0.0244961	0.137373	32356854
DRR300008_1	39.5001	0.00559223	0.147482	37045394
DRR300008_2	38.6818	0.0209142	0.146363	37045394
DRR300009_1	39.3988	0.00883844	0.0578039	37147854
DRR300009_2	38.0985	0.00547838	0.0590258	37147854
DRR300010_1	39.4937	0.00286684	0.180607	31404189
DRR300010_2	38.8615	0.0243739	0.179531	31404189
DRR300011_1	39.3197	0.0058379	0.303192	37397606
DRR300011_2	38.5685	0.0214508	0.300131	37397606
DRR300012_1	39.3466	0.00300173	0.16077	33708774
DRR300012_2	38.7035	0.0248057	0.159434	33708774
DRR300013_1	39.3271	0.00304267	0.160543	30863393
DRR300013_2	38.5802	0.0250235	0.15881	30863393
DRR300014_1	38.8835	0.00296299	0.108898	30357815
DRR300014_2	38.4556	0.0248349	0.107636	30357815
DRR300015_1	39.3237	0.00299978	0.0969681	36475366
DRR300015_2	38.6318	0.0249036	0.0961708	36475366
DRR300016_1	38.8431	0.00754908	0.101826	42373988
DRR300016_2	38.3635	0.0191252	0.101304	42373988
DRR300017_1	38.5813	0.00216799	0.16279	41330648
DRR300017_2	38.9389	0.0109171	0.161677	41330648
DRR300018_1	39.5847	0.00695928	0.183309	43304915
DRR300018_2	38.8025	0.0119647	0.181675	43304915
DRR300019_1	39.6489	0.00193188	0.18688	37148032
DRR300019_2	39.1661	0.00875008	0.185451	37148032
DRR314103_1	36.0486	0.00287688	0.000166197	78541449
DRR314103_2	35.814	0.0130573	0.00069487	78541449
DRR314104_1	36.1074	0.00255536	0.000168394	76322352
DRR314104_2	35.8972	0.0130627	0.000683388	76322352
DRR314105_1	35.955	0.00386358	0.000199593	92009317
DRR314105_2	35.6952	0.0130901	0.000804683	92009317
DRR314106_1	36.1106	0.00343389	0.00013186	79191795
DRR314106_2	35.7772	0.0130019	0.000789742	79191795
DRR314107_1	36.091	0.00297818	0.000182404	86694066
DRR314107_2	35.8648	0.0129285	0.000860266	86694066
DRR314108_1	36.103	0.00354282	0.000148743	76679376
DRR314108_2	35.9142	0.0130151	0.000659478	76679376
DRR315795_1	35.9939	0.0100128	0.000283911	31780260
DRR315795_2	35.6821	0.00824	0.00102459	31780260
DRR315796_1	36.0139	0.00788871	0.000207125	32782079
DRR315796_2	35.6846	0.00697602	0.00100365	32782079
DRR315797_1	35.9996	0.00699196	0.000219619	34931731
DRR315797_2	35.6706	0.0061754	0.00083625	34931731
DRR315798_1	36.0232	0.00667897	0.000234008	30604326
DRR315798_2	35.7742	0.00589058	0.000978783	30604326
DRR315799_1	36.0015	0.00708852	0.000201747	34900682
DRR315799_2	35.6936	0.00628998	0.000899712	34900682
DRR315800_1	36.0056	0.00876909	0.000260284	29367513
DRR315800_2	35.8284	0.007547	0.000997966	29367513
DRR315801_1	35.989	0.00881339	0.000268711	38355888
DRR315801_2	35.7259	0.00790707	0.000934436	38355888
DRR315802_1	36.0043	0.00691667	0.000207897	34151547
DRR315802_2	34.8645	0.00617124	0.000862219	34151547
DRR327412_1	35.5012	0.00806593	0.000332799	39720428
DRR327412_2	35.7512	0.000732263	0.000298624	39720428
DRR327413_1	35.5457	0.00800841	0.000341077	55268145
DRR327413_2	35.7187	0.000738962	0.000345404	55268145
DRR346817_1	38.9153	0.00350039	7.65459	25368870
DRR346817_2	38.5798	0.00304387	7.58732	25368870
DRR346818_1	38.9063	0.00353385	6.96656	24480255
DRR346818_2	38.5723	0.00305327	6.89622	24480255
DRR346819_1	38.883	0.00352765	7.34236	27216424
DRR346819_2	38.5487	0.00307398	7.27654	27216424
DRR346820_1	38.8825	0.00344475	6.93975	27523077
DRR346820_2	38.5512	0.00292922	6.87531	27523077
DRR351374_1	36.0113	0.00178635	0.00205652	9793159
DRR351374_2	35.9284	0.000265617	0.00202527	9793159
DRR351375_1	36.0092	0.00177918	0.00266268	11283841
DRR351375_2	35.8449	0.000288167	0.00224873	11283841
DRR351376_1	35.9972	0.00187067	0.00258242	10830777
DRR351376_2	35.8594	0.000299182	0.00222551	10830777
DRR351377_1	36.1207	0.00195119	0.00165042	12537761
DRR351377_2	36.0054	0.00141348	0.00124095	12537761
DRR351378_1	36.1464	0.00146812	0.00224852	11426717
DRR351378_2	36.123	0.00118285	0.00209975	11426717
DRR351379_1	36.0051	0.00188349	0.0021226	11682522
DRR351379_2	35.8156	0.000297863	0.00183793	11682522
DRR351380_1	36.0192	0.00186643	0.00327751	12082154
DRR351380_2	35.8425	0.000297929	0.00288056	12082154
DRR351381_1	36.0002	0.00187564	0.00204309	11436354
DRR351381_2	35.9787	0.000297748	0.00133228	11436354
DRR396556_1	38.96	0.0181676	0.0246676	17344627
DRR396556_2	37.5965	0.0141935	0.0235624	17344627
DRR396557_1	38.9729	0.0183563	0.036932	17432405
DRR396557_2	37.5213	0.0141708	0.035161	17432405
DRR396558_1	38.9776	0.0180843	0.0221099	21494398
DRR396558_2	37.4823	0.0141301	0.0207818	21494398
DRR396559_1	38.9782	0.0180576	0.0151449	21017249
DRR396559_2	37.4986	0.0140587	0.0140915	21017249
DRR396560_1	38.9585	0.0178797	0.0128577	20884666
DRR396560_2	37.5005	0.0140881	0.0119945	20884666
DRR396561_1	38.9656	0.0179561	0.0187059	17213711
DRR396561_2	37.5356	0.0140084	0.017468	17213711
DRR396562_1	38.9619	0.0179915	0.0201148	18891265
DRR396562_2	37.4737	0.0140605	0.0189802	18891265
DRR396563_1	38.9384	0.0181277	0.0256954	22788306
DRR396563_2	37.5579	0.0142424	0.0245206	22788306
DRR396564_1	38.9713	0.0185692	0.0285509	19441927
DRR396564_2	37.657	0.0141619	0.0268083	19441927
DRR400470_1	36.2833	0.000194541	0	24817631
DRR400470_2	36.1351	8.25e-05	0	24817631
DRR400471_1	36.2726	0.000188353	0	24706021
DRR400471_2	36.1777	8.23e-05	0	24706021
DRR400472_1	36.3499	0.000189815	0	19931577
DRR400472_2	36.1311	8.28e-05	0	19931577
DRR400473_1	36.2891	0.000184071	0	20216430
DRR400473_2	36.2167	8.14e-05	0	20216430
DRR400474_1	36.3039	0.000196863	0	26192479
DRR400474_2	36.188	7.92e-05	0	26192479
DRR400475_1	36.2926	0.000193381	0	18271206
DRR400475_2	36.1162	8.18e-05	0	18271206
DRR400476_1	36.3239	0.000184739	0	17814795
DRR400476_2	36.2391	8.41e-05	0	17814795
DRR400477_1	36.325	0.00019682	4.57e-06	20523243
DRR400477_2	36.2536	8.25e-05	0	20523243
DRR400478_1	36.3435	0.000200548	0	25092483
DRR400478_2	36.1429	7.92e-05	0	25092483
DRR400479_1	36.2615	0.000185761	0	23676311
DRR400479_2	36.1602	7.67e-05	0	23676311
DRR400480_1	36.3063	0.000195433	0	21304354
DRR400480_2	36.1545	8.24e-05	1.44e-06	21304354
DRR400481_1	36.29	0.000189793	0	27354773
DRR400481_2	36.0235	7.85e-05	0	27354773
DRR400482_1	36.3239	0.000186573	0	19863336
DRR400482_2	36.2457	7.51e-05	0	19863336
DRR400483_1	36.3194	0.000182721	0	22588224
DRR400483_2	36.2341	7.84e-05	0	22588224
DRR400484_1	36.2884	0.000182678	0	19212413
DRR400484_2	36.1416	7.6e-05	0	19212413
DRR400485_1	36.3005	0.000198411	0	19599448
DRR400485_2	36.1877	8.32e-05	0	19599448
DRR400486_1	36.346	0.000201916	0	24728427
DRR400486_2	36.2845	8.43e-05	0	24728427
DRR400487_1	36.3241	0.000190345	1.2e-06	32252986
DRR400487_2	36.2128	7.69e-05	0	32252986
DRR400488_1	36.2927	0.000187564	0	19342286
DRR400488_2	36.2255	7.92e-05	0	19342286
DRR400489_1	36.3051	0.000192832	0	23553388
DRR400489_2	36.146	7.96e-05	0	23553388
ERR10047706_1	36.134	0.00411212	0.130411	31861881
ERR10047706_2	35.7895	0.00103709	0.137322	31861881
ERR10047707_1	36.1446	0.00426276	0.122334	29814780
ERR10047707_2	35.9449	0.000828819	0.125888	29814780
ERR10300781_1	36.4062	0.00590189	0.174684	31507812
ERR10300781_2	36.228	0.000241945	0.176685	31507812
ERR10300785_1	36.3605	0.00621311	0.134147	35938426
ERR10300785_2	36.2068	0.000166967	0.136929	35938426
ERR10300787_1	36.3462	0.00626282	0.0994068	38175085
ERR10300787_2	36.1155	0.000174473	0.101513	38175085
ERR10300788_1	36.3507	0.00627887	0.09854	35280127
ERR10300788_2	36.0877	0.000173901	0.100524	35280127
ERR10300789_1	36.3553	0.00623455	0.0925716	30291542
ERR10300789_2	36.1085	0.000166001	0.0952237	30291542
ERR10300790_1	36.3614	0.00625291	0.0942571	31974348
ERR10300790_2	36.2421	0.000174482	0.0972451	31974348
ERR10300791_1	36.3645	0.00624566	0.103599	35331671
ERR10300791_2	36.1855	0.000174705	0.10678	35331671
ERR10300792_1	36.3381	0.00594016	0.092958	31999998
ERR10300792_2	36.1779	0.000243997	0.0960547	31999998
ERR10300793_1	36.3417	0.0062607	0.195336	29552515
ERR10300793_2	36.1524	0.000169885	0.197865	29552515
ERR10300794_1	36.3354	0.00587702	0.0700269	32736857
ERR10300794_2	36.1403	0.000344871	0.0730414	32736857
ERR10300795_1	36.3434	0.00619719	0.0613258	30422955
ERR10300795_2	36.1533	0.000165301	0.0644566	30422955
ERR10300796_1	36.2818	0.00497093	0.163686	29367498
ERR10300796_2	36.1187	0.000328164	0.166105	29367498
ERR10300797_1	36.0573	0.00204627	0.214955	32368217
ERR10300797_2	35.6465	0.000818103	0.213287	32368217
ERR10300798_1	36.1429	0.00188049	0.105454	32328154
ERR10300798_2	35.6743	0.000745708	0.104738	32328154
ERR10300799_1	36.0833	0.00197631	0.103143	31434434
ERR10300799_2	35.5247	0.000767931	0.102391	31434434
ERR10300800_1	36.0556	0.00197933	0.0835266	31966624
ERR10300800_2	35.6148	0.000803585	0.0820598	31966624
ERR10300801_1	36.0419	0.00198959	0.0720362	30524057
ERR10300801_2	35.4772	0.000788576	0.0711813	30524057
ERR10300802_1	36.0474	0.0020172	0.101517	31771723
ERR10300802_2	35.5166	0.000821999	0.0998448	31771723
ERR10300803_1	36.1051	0.00189994	0.11648	31744525
ERR10300803_2	35.6739	0.000726076	0.115995	31744525
ERR10300804_1	36.0817	0.0019733	0.122014	32679745
ERR10300804_2	35.6183	0.000784519	0.11976	32679745
ERR10300805_1	36.0778	0.00201187	0.0985312	34361369
ERR10300805_2	35.5633	0.00079998	0.0971804	34361369
ERR10300806_1	36.0335	0.00192952	0.0473826	29437407
ERR10300806_2	35.4564	0.000781229	0.0469986	29437407
ERR10300807_1	36.0435	0.00200372	0.0802693	31242763
ERR10300807_2	35.5547	0.000792436	0.079801	31242763
ERR10300808_1	36.0256	0.00202332	0.101557	35078829
ERR10300808_2	35.4719	0.000810355	0.100103	35078829
ERR10300809_1	36.081	0.00197038	0.177971	33582640
ERR10300809_2	35.6149	0.000772642	0.177257	33582640
ERR10300810_1	36.1073	0.00283694	0.0939824	34137002
ERR10300810_2	35.599	0.000504423	0.0932962	34137002
ERR10300811_1	36.0442	0.00197733	0.132301	32512968
ERR10300811_2	35.4973	0.000795602	0.130614	32512968
ERR10300812_1	36.1286	0.00241889	0.0770676	35041265
ERR10300812_2	35.6754	0.000683315	0.0770199	35041265
ERR10300813_1	35.9939	0.00271253	0.135516	31237089
ERR10300813_2	35.5197	0.000319795	0.138585	31237089
ERR10300814_1	36.0642	0.00201523	0.178767	33704163
ERR10300814_2	35.4989	0.000796872	0.174499	33704163
ERR10368082_1	35.9946	0.000732394	1.41489	36216108
ERR10368082_2	35.6713	0.00133146	1.39844	36216108
ERR10368083_1	36.0182	0.000722003	1.51662	36090023
ERR10368083_2	35.5839	0.0013232	1.48923	36090023
ERR10368084_1	35.9907	0.000715186	1.56623	33063190
ERR10368084_2	35.6634	0.00130208	1.53617	33063190
ERR10368085_1	36.0254	0.00760901	2.11743	34643914
ERR10368085_2	35.5733	0.00113421	2.06816	34643914
ERR10368086_1	35.9961	0.000720219	1.57829	36322662
ERR10368086_2	35.6133	0.00130949	1.55455	36322662
ERR10368087_1	36.0344	0.00762551	2.30379	36193658
ERR10368087_2	35.6981	0.00110217	2.28272	36193658
ERR10368088_1	35.978	0.00072499	1.59955	36200504
ERR10368088_2	35.5943	0.00133339	1.57349	36200504
ERR10368089_1	35.9546	0.000727721	1.90842	36307666
ERR10368089_2	35.6071	0.00132935	1.87966	36307666
ERR10368090_1	35.9934	0.000729643	0.651979	36357016
ERR10368090_2	35.6357	0.00133278	0.63967	36357016
ERR10368091_1	35.9992	0.00756235	2.49849	36003367
ERR10368091_2	35.7376	0.0011277	2.4498	36003367
ERR10372888_1	36.1309	0.0036986	3.48993	243473250
ERR10372888_2	35.7856	0.000473351	3.48393	243473250
ERR10372889_1	36.1914	0.00370349	4.31481	136266409
ERR10372889_2	35.8507	0.000474349	4.2959	136266409
ERR10377996_1	35.8057	0.00307444	0.0730283	40057017
ERR10377996_2	35.4267	0.00786028	0.079021	40057017
ERR1295143_1	37.0209	0.000729375	0.182847	18678371
ERR1295143_2	36.0238	0.0154641	0.180686	18678371
ERR1295144_1	36.693	0.000747981	0.0553747	22913979
ERR1295144_2	35.7111	0.0156751	0.0526457	22913979
ERR1331722_1	35.1706	0.0184238	1.1683	36550692
ERR1331722_2	35.214	0.0780194	1.18776	36550692
ERR1331723_1	35.5581	0.018753	0.546752	18558961
ERR1331723_2	35.6345	0.0783491	0.550813	18558961
ERR1940497_1	35.6471	0.00754709	0.341624	2838004
ERR1940497_2	35.1744	0.152751	0.324502	2838004
ERR1940498_1	35.7038	0.00798187	0.103139	2852463
ERR1940498_2	35.159	0.150912	0.0975686	2852463
ERR1940499_1	35.6523	0.00759556	0.201129	3035281
ERR1940499_2	35.2964	0.151765	0.190501	3035281
ERR1940504_1	35.6486	0.00779143	0.123952	2894293
ERR1940504_2	35.1518	0.153386	0.116318	2894293
ERR1940505_1	35.6586	0.00746559	0.21373	3070977
ERR1940505_2	35.1734	0.152902	0.20477	3070977
ERR1940542_1	35.6335	0.00777523	0.0680675	3241749
ERR1940542_2	35.0484	0.153951	0.0653785	3241749
ERR1940543_1	35.6241	0.00718521	0.0690762	2822652
ERR1940543_2	35.0422	0.152531	0.0668277	2822652
ERR1940544_1	35.7124	0.00795696	0.0940077	3249984
ERR1940544_2	35.0139	0.156665	0.0890528	3249984
ERR1940548_1	35.7024	0.00745438	0.142957	3871190
ERR1940548_2	35.2505	0.151763	0.134993	3871190
ERR1940549_1	35.7751	0.00819688	0.0672191	3957602
ERR1940549_2	35.0559	0.154229	0.0636919	3957602
ERR1940550_1	35.5235	0.00727587	0.0407164	2711978
ERR1940550_2	35.2057	0.151391	0.0391838	2711978
ERR1940587_1	35.651	0.0120958	0.342169	2846833
ERR1940587_2	35.1693	0.159241	0.325538	2846833
ERR1940588_1	35.7073	0.0120807	0.105307	2859655
ERR1940588_2	35.1476	0.169727	0.100061	2859655
ERR1940589_1	35.6554	0.0118491	0.20499	3042931
ERR1940589_2	35.2952	0.168799	0.193009	3042931
ERR1940593_1	35.6634	0.0119375	0.238366	3057492
ERR1940593_2	35.2426	0.162781	0.225525	3057492
ERR1940594_1	35.6539	0.0121156	0.127308	2895655
ERR1940594_2	35.1468	0.167133	0.120735	2895655
ERR1940595_1	35.6642	0.0121738	0.2162	3080815
ERR1940595_2	35.1693	0.164724	0.206251	3080815
ERR1940638_1	35.7083	0.0121934	0.146492	3880128
ERR1940638_2	35.2512	0.162679	0.137425	3880128
ERR1940639_1	35.7819	0.0132009	0.0684789	3966388
ERR1940639_2	35.0517	0.16665	0.0645002	3966388
ERR1940640_1	35.5355	0.010978	0.0401082	2715001
ERR1940640_2	35.2037	0.163776	0.0384335	2715001
ERR1952912_1	35.637	0.00508335	0.27864	2850091
ERR1952912_2	35.2653	0.0656133	0.280714	2850091
ERR1952913_1	35.7041	0.00509896	0.0826919	2863851
ERR1952913_2	35.2352	0.0681339	0.0835184	2863851
ERR1952914_1	35.6508	0.00505756	0.172919	3062873
ERR1952914_2	35.2785	0.0691333	0.172393	3062873
ERR1952918_1	35.6551	0.00515249	0.200277	3073467
ERR1952918_2	35.3227	0.0675237	0.201032	3073467
ERR1952919_1	35.6372	0.00509714	0.106551	2912480
ERR1952919_2	35.1876	0.0657089	0.107732	2912480
ERR1952920_1	35.6461	0.00507748	0.170875	3087356
ERR1952920_2	35.2053	0.0676955	0.172339	3087356
ERR1952957_1	35.618	0.00507001	0.0542021	3264952
ERR1952957_2	35.1663	0.0671785	0.0545036	3264952
ERR1952958_1	35.6151	0.00512855	0.0544539	2848366
ERR1952958_2	35.1058	0.0677825	0.0555154	2848366
ERR1952959_1	35.7013	0.00514826	0.0763343	3254433
ERR1952959_2	35.0596	0.0667385	0.077188	3254433
ERR1952963_1	35.6922	0.00511401	0.123657	3884490
ERR1952963_2	35.2901	0.0687359	0.123571	3884490
ERR1952964_1	35.7754	0.00513856	0.0588569	3952597
ERR1952964_2	35.1518	0.0690597	0.0591794	3952597
ERR1952965_1	35.5551	0.00499872	0.0340898	2757241
ERR1952965_2	35.2348	0.0639441	0.0344287	2757241
ERR1953002_1	35.6713	0.00611992	0.273663	2838166
ERR1953002_2	35.2546	0.0645901	0.276	2838166
ERR1953003_1	35.7348	0.00608195	0.0824095	2852373
ERR1953003_2	35.2304	0.0657081	0.0824905	2852373
ERR1953004_1	35.691	0.00621435	0.168201	3051645
ERR1953004_2	35.2739	0.0643683	0.168585	3051645
ERR1953008_1	35.6894	0.00583336	0.19303	3054387
ERR1953008_2	35.3134	0.0666573	0.193962	3054387
ERR1953009_1	35.6702	0.0061557	0.102323	2898562
ERR1953009_2	35.1715	0.0656215	0.102493	2898562
ERR1953010_1	35.6833	0.00609115	0.166046	3073530
ERR1953010_2	35.1942	0.0662539	0.167555	3073530
ERR1953047_1	35.654	0.00619517	0.0520433	3252639
ERR1953047_2	35.157	0.0643719	0.0529128	3252639
ERR1953048_1	35.6516	0.00577544	0.0528575	2836608
ERR1953048_2	35.0935	0.0659196	0.0538291	2836608
ERR1953049_1	35.7346	0.00613989	0.0733514	3239800
ERR1953049_2	35.0502	0.0674264	0.0742402	3239800
ERR1953053_1	35.7272	0.0059113	0.121519	3867170
ERR1953053_2	35.2798	0.0647147	0.121815	3867170
ERR1953054_1	35.8043	0.00623857	0.0564423	3930812
ERR1953054_2	35.1429	0.0675185	0.0565381	3930812
ERR1953055_1	35.6006	0.00577167	0.0340679	2749521
ERR1953055_2	35.2131	0.0645805	0.0343725	2749521
ERR2014766_1	37.8683	0.00674203	0.000327946	37829394
ERR2014766_2	37.1622	0.00743717	0.0140222	37829394
ERR2014767_1	37.8102	0.00664079	0.000220398	41039377
ERR2014767_2	37.1613	0.00736495	0.0258765	41039377
ERR2014768_1	37.8891	0.00669611	0.00023514	39789115
ERR2014768_2	37.0805	0.00739849	0.0149714	39789115
ERR2014769_1	37.7727	0.00655912	8.66e-05	34011127
ERR2014769_2	36.8545	0.00717806	0.0251645	34011127
ERR2014770_1	37.6971	0.00652176	0.000127278	42819735
ERR2014770_2	36.4875	0.00711901	0.0232437	42819735
ERR2014771_1	37.8641	0.00671215	0.000197193	42405077
ERR2014771_2	37.2923	0.00746765	0.0232596	42405077
ERR2014772_1	37.8737	0.00657924	9.28e-05	35800546
ERR2014772_2	37.1544	0.00729434	0.0286869	35800546
ERR2014773_1	37.8026	0.00660817	0.000215375	39029552
ERR2014773_2	36.8643	0.00732389	0.0296291	39029552
ERR2014774_1	37.8218	0.00666319	0.000216706	41973926
ERR2014774_2	37.3039	0.00740567	0.0369588	41973926
ERR2014775_1	37.7983	0.00660123	0.000218368	38325217
ERR2014775_2	37.266	0.00730433	0.0243373	38325217
ERR2014776_1	37.4475	0.00208131	0.000210342	44361119
ERR2014776_2	36.2286	0.0268947	0.0641806	44361119
ERR2014777_1	37.3982	0.00206509	0.000193624	43207408
ERR2014777_2	35.6636	0.0267864	0.0407389	43207408
ERR2014778_1	37.2965	0.00201906	0.000245608	42066996
ERR2014778_2	36.1467	0.0266446	0.0641147	42066996
ERR2014779_1	37.8976	0.00673392	0.00051514	31760327
ERR2014779_2	37.2513	0.00347592	0.057434	31760327
ERR2014780_1	37.858	0.00677344	0.000377904	34807795
ERR2014780_2	37.059	0.00345241	0.0474957	34807795
ERR2014781_1	37.9095	0.00677418	0.000453902	46996967
ERR2014781_2	37.1255	0.00347514	0.0580674	46996967
ERR2014782_1	37.8599	0.00671998	0.000646569	46725083
ERR2014782_2	37.2009	0.00345432	0.106335	46725083
ERR2014783_1	37.8455	0.00671111	0.000315055	41176901
ERR2014783_2	36.7728	0.0034071	0.0704824	41176901
ERR2014784_1	37.8915	0.00679505	0.000398228	41662020
ERR2014784_2	37.1209	0.0034969	0.0558684	41662020
ERR2014785_1	37.9505	0.00682151	0.000396332	38016153
ERR2014785_2	37.2375	0.00352404	0.0518304	38016153
ERR2014786_1	37.8532	0.00671769	0.000376227	36884677
ERR2014786_2	36.6331	0.00344393	0.045315	36884677
ERR2014787_1	37.8962	0.0067714	0.000370448	40097354
ERR2014787_2	37.1929	0.00347806	0.0416626	40097354
ERR2014788_1	37.8208	0.00663524	0.000324077	35988373
ERR2014788_2	37.0508	0.0033958	0.0553846	35988373
ERR2014789_1	37.4739	0.00210072	0.000187422	43943532
ERR2014789_2	36.4366	0.0271251	0.0310045	43943532
ERR2014790_1	37.4611	0.00208423	0.000203357	53929717
ERR2014790_2	36.1326	0.0265419	0.0259203	53929717
ERR2014791_1	37.3801	0.00204633	0.000227308	49351434
ERR2014791_2	36.1333	0.0265388	0.058608	49351434
ERR2014792_1	37.3476	0.0020479	9.48e-05	42865216
ERR2014792_2	36.1127	0.0267675	0.0386225	42865216
ERR2014793_1	37.3453	0.00209531	0.000235652	44871335
ERR2014793_2	36.2569	0.0268505	0.0554318	44871335
ERR2014794_1	37.4722	0.00211176	0.00023565	45703322
ERR2014794_2	36.3778	0.0269657	0.0708427	45703322
ERR2060271_1	34.7224	0.00622972	1.07204	32959705
ERR2060271_2	34.1301	0.0171113	1.07732	32959705
ERR2060272_1	34.798	0.00623837	1.1452	30273888
ERR2060272_2	34.1643	0.0173507	1.15551	30273888
ERR2060273_1	34.8572	0.00624406	1.13538	33218584
ERR2060273_2	34.214	0.0173268	1.14685	33218584
ERR2060274_1	34.8961	0.00629627	1.41341	29414216
ERR2060274_2	34.3559	0.0171343	1.41999	29414216
ERR2060275_1	34.8525	0.00642613	2.12222	41079845
ERR2060275_2	34.2886	0.0176086	2.13787	41079845
ERR2249224_1	35.9528	0.000805742	0.00550471	18119086
ERR2249224_2	35.4475	0.000705313	0.00525876	18119086
ERR2249225_1	35.8933	0.000784574	0.0056951	16908006
ERR2249225_2	35.4785	0.000677121	0.00558611	16908006
ERR2249226_1	35.9371	0.000787484	0.0043078	18667369
ERR2249226_2	35.456	0.000682129	0.00400898	18667369
ERR2563840_1	33.9517	0.00611639	0.000952158	35532225
ERR2563840_2	32.8133	0.0300402	0.00145969	35532225
ERR2576316_1	36.5104	0.00111456	0.00282916	8375948
ERR2576316_2	36.7349	0.000392178	0.00112713	8375948
ERR2576317_1	36.4627	0.00112595	0.00158792	9352507
ERR2576317_2	36.7369	0.00039479	0.000531234	9352507
ERR2576318_1	36.5399	0.00115549	0.00152599	10058350
ERR2576318_2	36.7471	0.000391075	0.000522766	10058350
ERR2576319_1	36.5437	0.0011441	0.00235933	6804083
ERR2576319_2	36.7542	0.000384493	0.00235438	6804083
ERR2576320_1	36.626	0.00118847	0.00316094	9553155
ERR2576320_2	36.7854	0.000387658	0.00219833	9553155
ERR2576321_1	36.6064	0.00116686	0.00199711	17278532
ERR2576321_2	36.7788	0.000383663	0.00157267	17278532
ERR2576322_1	36.5009	0.00111723	0.00224987	6038433
ERR2576322_2	36.7122	0.000383241	0.00184448	6038433
ERR2576323_1	36.5771	0.0011574	0.00232775	8396033
ERR2576323_2	36.786	0.000391635	0.00191526	8396033
ERR2576324_1	36.4824	0.000651865	0.0011953	7417692
ERR2576324_2	36.5913	0.000431021	0.000387105	7417692
ERR2576325_1	36.4595	0.00064727	0.00117651	10674065
ERR2576325_2	36.5818	0.000397883	0.000560485	10674065
ERR2576326_1	36.4301	0.000629694	0.0016132	9066164
ERR2576326_2	36.521	0.000415636	0.00212182	9066164
ERR2576327_1	36.4239	0.000599135	0.00124882	8405472
ERR2576327_2	36.5702	0.000397321	0.000798435	8405472
ERR2576328_1	36.3834	0.000614917	0.000879126	9457442
ERR2576328_2	36.533	0.000391977	0.000500092	9457442
ERR2576329_1	36.3649	0.000598342	0.000937116	10849611
ERR2576329_2	36.5047	0.000401155	0.000625904	10849611
ERR2576330_1	36.4416	0.000618783	0.00117708	9523757
ERR2576330_2	36.606	0.000413815	0.000446252	9523757
ERR2576331_1	36.3486	0.000604529	0.00117864	20165078
ERR2576331_2	36.513	0.000396537	0.000676862	20165078
ERR2576332_1	36.2956	0.000574612	0.000959018	6858630
ERR2576332_2	36.5192	0.000351156	0.000511645	6858630
ERR2576333_1	36.239	0.000557211	0.00107103	9714117
ERR2576333_2	36.4823	0.000361894	0.000578266	9714117
ERR2576334_1	36.369	0.000586732	0.000791144	7720671
ERR2576334_2	36.5743	0.000369472	0.000524566	7720671
ERR2576335_1	36.3464	0.000588487	0.000906443	8751408
ERR2576335_2	36.566	0.000367915	0.000579965	8751408
ERR2576336_1	36.4295	0.000602946	0.00122215	9130787
ERR2576336_2	36.6358	0.000378531	0.000408687	9130787
ERR2576337_1	36.4565	0.00113848	0.00119198	5679112
ERR2576337_2	36.718	0.000410061	0.00051244	5679112
ERR2576338_1	36.5055	0.000617025	0.00110618	9563194
ERR2576338_2	36.6569	0.000382908	0.00021351	9563194
ERR2576339_1	36.4582	0.000612344	0.00127969	8295216
ERR2576339_2	36.6408	0.000366931	0.000689726	8295216
ERR2639618_1	38.3001	0.0335806	0.0721356	147070529
ERR2639618_2	36.2051	0.0621499	0.0832673	147070529
ERR2798249_1	31.9936	0.009012	1.98785	102399849
ERR2798249_2	31.8815	0.0225874	2.0041	102399849
ERR2851716_1	35.3178	0.0160415	0.000111841	4052421
ERR2851716_2	32.2324	0.244367	6.86e-05	4052421
ERR2851717_1	35.3701	0.0162042	6.73e-05	3883562
ERR2851717_2	33.3184	0.251056	0.000134858	3883562
ERR2851718_1	35.5344	0.015641	0.00277649	563196
ERR2851718_2	28.1671	0.201658	0.000106836	563196
ERR2851719_1	34.6165	0.0440525	0.000102346	5421183
ERR2851719_2	33.4492	0.0528627	0.000216891	5421183
ERR2851720_1	34.9468	0.0441329	7.42e-05	7006239
ERR2851720_2	33.1658	0.0537065	0.000209145	7006239
ERR2851721_1	34.8239	0.0444076	0.000143215	9814960
ERR2851721_2	33.7149	0.0531457	0.000201223	9814960
ERR2851722_1	34.7238	0.0442406	7.09e-05	7393221
ERR2851722_2	33.5147	0.0523765	0.000228631	7393221
ERR2851723_1	35.139	0.0144306	4.67e-05	11627819
ERR2851723_2	34.8656	0.00154557	6e-05	11627819
ERR2851724_1	35.0719	0.0145262	2.75e-05	6632080
ERR2851724_2	34.4972	0.0016523	3.42e-05	6632080
ERR2851725_1	35.0429	0.0142856	4.33e-05	5626854
ERR2851725_2	34.9034	0.00162122	4.74e-05	5626854
ERR2851726_1	34.8204	0.0142498	2.33e-05	5684403
ERR2851726_2	34.5158	0.00161295	7.02e-05	5684403
ERR2851727_1	34.9763	0.0141531	7.25e-05	6558336
ERR2851727_2	34.3659	0.00144023	0.000138951	6558336
ERR2851728_1	34.8671	0.0138133	9.07e-05	7435205
ERR2851728_2	34.8025	0.00154278	0.000131892	7435205
ERR2851730_1	34.8761	0.0142337	0.000188631	6549741
ERR2851730_2	35.0251	0.00138686	9.28e-05	6549741
ERR2851731_1	34.9314	0.0141963	5.65e-05	7132612
ERR2851731_2	34.3986	0.00148027	6.58e-05	7132612
ERR2851732_1	35.2929	0.0131292	0.000217211	5353806
ERR2851732_2	33.5002	0.00178252	4.71e-05	5353806
ERR2851733_1	35.3535	0.013237	5.31e-05	8450019
ERR2851733_2	33.5215	0.0015298	6.57e-05	8450019
ERR2851734_1	35.3444	0.0134196	3e-05	7274759
ERR2851734_2	33.7326	0.00150172	0.000108972	7274759
ERR2851735_1	35.3533	0.013815	1.67e-05	10453006
ERR2851735_2	33.7543	0.00160048	4.08e-05	10453006
ERR2851736_1	35.3878	0.0133037	4.52e-05	9808199
ERR2851736_2	34.2195	0.00169048	0.000129582	9808199
ERR2851737_1	35.3214	0.0133527	9.31e-05	6749439
ERR2851737_2	33.4898	0.00165221	0.000114227	6749439
ERR2851738_1	34.6617	0.00558155	0	6709735
ERR2851738_2	33.6437	0.204129	4.39e-05	6709735
ERR2851739_1	35.0163	0.00590345	1.09e-05	8564554
ERR2851739_2	33.6665	0.206834	1.42e-05	8564554
ERR2851740_1	35.0003	0.00572327	0	7879063
ERR2851740_2	33.9626	0.203574	7.78e-06	7879063
ERR348424_1	36.6388	0.00112386	0.949117	4621740
ERR348424_2	36.2046	0.200023	0.870831	4621740
ERR348425_1	36.7647	0.000957456	0.0901493	6652807
ERR348425_2	36.8921	0.203456	0.0854362	6652807
ERR348426_1	36.9928	0.00120033	0.218501	6805309
ERR348426_2	37.1885	0.201122	0.204267	6805309
ERR348427_1	36.7608	0.00138775	0.105012	7442176
ERR348427_2	36.9662	0.0310448	0.0967058	7442176
ERR348428_1	36.7243	0.000981636	0.0937831	9601911
ERR348428_2	36.9276	0.200632	0.0883917	9601911
ERR348429_1	36.8671	0.0011368	0.142922	10505845
ERR348429_2	36.9264	0.205495	0.13337	10505845
ERR348430_1	36.8664	0.00457911	0.0674832	4260751
ERR348430_2	37.0602	0.0169931	0.0629629	4260751
ERR348431_1	36.7523	0.00454913	0.125031	10056113
ERR348431_2	36.9526	0.0165821	0.116986	10056113
ERR348432_1	36.8143	0.00138696	0.133	4958976
ERR348432_2	37.0803	0.031123	0.124958	4958976
ERR348433_1	36.7939	0.000987731	0.0828237	6278192
ERR348433_2	36.9016	0.201361	0.0766654	6278192
ERR348434_1	36.9841	0.00116093	0.105601	7307674
ERR348434_2	37.1193	0.202884	0.0973653	7307674
ERR348435_1	36.8481	0.00145113	0.066944	9670083
ERR348435_2	36.9467	0.0310263	0.0617045	9670083
ERR348436_1	36.9492	0.00117645	0.104495	5620975
ERR348436_2	37.1152	0.203695	0.0984497	5620975
ERR348437_1	36.884	0.00141139	0.0884064	4186052
ERR348437_2	37.1242	0.0303972	0.0837848	4186052
ERR348438_1	36.6846	0.000974584	0.166842	7453390
ERR348438_2	36.8699	0.200449	0.157331	7453390
ERR348439_1	36.8688	0.0047328	0.188219	9014763
ERR348439_2	37.0272	0.0169495	0.174506	9014763
ERR348440_1	36.5943	0.000858131	0.0696267	5407915
ERR348440_2	36.6884	0.200508	0.0655171	5407915
ERR348441_1	36.691	0.000967261	0.0962723	6424277
ERR348441_2	36.7736	0.196681	0.0889724	6424277
ERR348442_1	36.6687	0.0045684	0.713418	6033609
ERR348442_2	36.5287	0.0164908	0.654398	6033609
ERR348443_1	36.7969	0.00451499	0.162148	5968754
ERR348443_2	36.9942	0.0162977	0.150015	5968754
ERR348444_1	36.9245	0.00118925	0.200316	7549240
ERR348444_2	37.1355	0.203937	0.191883	7549240
ERR348445_1	36.9327	0.00480148	0.171896	6245169
ERR348445_2	37.1421	0.0170243	0.1624	6245169
ERR3568401_1	39.6288	0.0220736	0.0318878	113049033
ERR3568401_2	39.2152	0.0139924	0.0421984	113049033
ERR3568402_1	39.6045	0.0221662	0.0316207	107664579
ERR3568402_2	39.011	0.0140463	0.0449936	107664579
ERR3568403_1	39.6335	0.0222249	0.030829	128011552
ERR3568403_2	39.0425	0.0140594	0.041016	128011552
ERR3568404_1	39.7569	0.0229609	0.0442446	108362927
ERR3568404_2	39.5278	0.0144754	0.0561577	108362927
ERR3568405_1	39.6404	0.022336	0.0324329	132723666
ERR3568405_2	39.056	0.0141233	0.0468426	132723666
ERR3568406_1	39.6768	0.0223245	0.0331276	124239717
ERR3568406_2	39.2398	0.0141149	0.0431501	124239717
ERR3568407_1	39.5946	0.0220171	0.0255722	89966294
ERR3568407_2	38.7739	0.0139163	0.0390644	89966294
ERR3568408_1	39.6065	0.02162	0.0258611	106443865
ERR3568408_2	38.9518	0.0138039	0.0361534	106443865
ERR3568409_1	39.5878	0.0218538	0.0313795	101132968
ERR3568409_2	38.833	0.0138551	0.0412888	101132968
ERR3568410_1	39.5821	0.0222769	0.0346537	105839753
ERR3568410_2	39.0922	0.0140816	0.0445453	105839753
ERR3568411_1	39.614	0.0220073	0.0284743	112637146
ERR3568411_2	38.985	0.0139421	0.0388319	112637146
ERR3568412_1	39.622	0.021857	0.0254167	115860625
ERR3568412_2	39.001	0.0138679	0.0372757	115860625
ERR3568413_1	39.6032	0.0218551	0.0235666	101087472
ERR3568413_2	39.0335	0.013931	0.0371116	101087472
ERR3568414_1	39.603	0.0219276	0.0275295	113676078
ERR3568414_2	38.957	0.0139127	0.0442211	113676078
ERR3568415_1	39.6197	0.0222538	0.0295005	99016875
ERR3568415_2	39.0155	0.0140803	0.041983	99016875
ERR3568416_1	39.6021	0.0218143	0.0150627	101157503
ERR3568416_2	38.8487	0.0138038	0.0228824	101157503
ERR3568417_1	39.6218	0.0220712	0.0193574	111423226
ERR3568417_2	38.9366	0.0140457	0.0300982	111423226
ERR3568418_1	39.6377	0.0218918	0.0296835	113448680
ERR3568418_2	39.0011	0.0139464	0.0448713	113448680
ERR3568419_1	39.5924	0.0219603	0.0271824	114988033
ERR3568419_2	38.9364	0.0139339	0.0393869	114988033
ERR3568420_1	39.5873	0.0219537	0.0220536	95671033
ERR3568420_2	38.9416	0.0138882	0.0332643	95671033
ERR3568421_1	39.688	0.0226298	0.0316092	113684646
ERR3568421_2	39.2973	0.0143479	0.0454636	113684646
ERR3568422_1	39.7222	0.0228715	0.0595295	140630858
ERR3568422_2	39.4362	0.0144789	0.0762842	140630858
ERR3568423_1	39.6478	0.0221696	0.030952	130687384
ERR3568423_2	39.1459	0.0141372	0.046407	130687384
ERR3568424_1	39.5814	0.0220667	0.0283485	110956720
ERR3568424_2	38.8505	0.0139746	0.0451305	110956720
ERR3568425_1	39.5863	0.0219004	0.0260729	112000192
ERR3568425_2	38.9138	0.0138942	0.0418477	112000192
ERR3568426_1	39.6122	0.0221457	0.026825	104909613
ERR3568426_2	38.925	0.0140306	0.0404533	104909613
ERR3568427_1	39.6756	0.0224172	0.0381619	109619183
ERR3568427_2	39.2292	0.0142116	0.0509079	109619183
ERR3568428_1	39.5953	0.021845	0.0235526	102773589
ERR3568428_2	38.9334	0.0138468	0.0350155	102773589
ERR3568431_1	39.5449	0.022021	0.0225632	109665433
ERR3568431_2	38.9304	0.0138991	0.0351149	109665433
ERR3568432_1	39.6542	0.0223017	0.0284428	145581094
ERR3568432_2	39.0941	0.0141618	0.0376632	145581094
ERR3625179_1	37.0688	0.0201618	3.09023	5238437
ERR3625179_2	34.1234	0.00672996	3.08609	5238437
ERR3625180_1	37.2227	0.0372443	3.12378	5146930
ERR3625180_2	34.0959	0.0190073	3.1221	5146930
ERR3625181_1	37.1308	0.0200513	3.19886	5272728
ERR3625181_2	34.3271	0.0080279	3.18468	5272728
ERR3625182_1	38.2624	0.0193799	3.08295	5542735
ERR3625182_2	35.1378	0.00756267	3.03915	5542735
ERR3625183_1	38.2834	0.00671682	3.08978	5648589
ERR3625183_2	35.9027	0.013327	3.10343	5648589
ERR3625184_1	37.528	0.016666	3.71451	5039686
ERR3625184_2	33.6929	0.0189495	3.57539	5039686
ERR3625185_1	38.0401	0.0347825	2.50508	5395848
ERR3625185_2	36.4431	0.036129	2.54551	5395848
ERR3625186_1	37.4136	0.0218446	2.4361	5107194
ERR3625186_2	35.3578	0.0115202	2.44447	5107194
ERR3625187_1	37.2825	0.0371291	2.46094	4881391
ERR3625187_2	34.8457	0.0187205	2.46022	4881391
ERR3625188_1	37.1865	0.020379	2.50202	5023960
ERR3625188_2	35.0573	0.00814623	2.49578	5023960
ERR3625189_1	37.1322	0.0199697	2.43151	4950529
ERR3625189_2	34.8996	0.00665734	2.43646	4950529
ERR3625190_1	38.3288	0.00672987	2.45186	5304829
ERR3625190_2	36.8332	0.0133467	2.47612	5304829
ERR3625191_1	38.3102	0.01944	2.45586	5190207
ERR3625191_2	36.1733	0.00742856	2.44104	5190207
ERR3625192_1	37.5567	0.016587	2.84382	4933042
ERR3625192_2	34.1843	0.0189046	2.73404	4933042
ERR3625193_1	38.1081	0.034495	3.20128	1261601
ERR3625193_2	36.7449	0.036111	3.24827	1261601
ERR3625194_1	37.3803	0.0379234	3.19199	4358708
ERR3625194_2	35.4147	0.0189579	3.20068	4358708
ERR3625195_1	37.2708	0.0203613	3.22673	4507457
ERR3625195_2	35.5667	0.00815257	3.22643	4507457
ERR3625196_1	37.4981	0.0220626	3.19001	4455264
ERR3625196_2	35.8783	0.0118028	3.20546	4455264
ERR3625197_1	37.212	0.0198576	3.16344	4408645
ERR3625197_2	35.4209	0.00663386	3.17706	4408645
ERR3625198_1	38.3872	0.0202751	3.21186	4537421
ERR3625198_2	36.5768	0.00782528	3.18933	4537421
ERR3625199_1	38.4031	0.00676756	3.20477	4642113
ERR3625199_2	37.2198	0.0130507	3.23085	4642113
ERR3625200_1	37.6448	0.0170048	3.5833	4513728
ERR3625200_2	34.6681	0.0193254	3.46304	4513728
ERR3625201_1	38.0581	0.0349361	2.98505	1701069
ERR3625201_2	36.5403	0.0364613	3.00509	1701069
ERR3625202_1	37.4184	0.021841	2.9149	5014380
ERR3625202_2	35.4582	0.0115151	2.90142	5014380
ERR3625203_1	37.1908	0.0201955	2.99713	4943182
ERR3625203_2	35.1793	0.00788454	2.97194	4943182
ERR3625204_1	37.137	0.0199709	2.917	4884748
ERR3625204_2	35.0222	0.00656178	2.90649	4884748
ERR3625205_1	37.299	0.037379	2.95068	4817799
ERR3625205_2	34.9617	0.0186996	2.93448	4817799
ERR3625206_1	38.3467	0.00667031	2.93139	5201724
ERR3625206_2	37.0499	0.0133562	2.94055	5201724
ERR3625207_1	38.3298	0.0179421	2.93388	5098128
ERR3625207_2	36.4258	0.0077035	2.90338	5098128
ERR3625208_1	37.5762	0.0165669	3.40852	4829157
ERR3625208_2	34.2631	0.0189421	3.26453	4829157
ERR4029291_1	35.2642	0.00885498	1.77564	21562284
ERR4029291_2	34.8188	1.19e-05	1.76947	21562284
ERR4029292_1	35.308	0.00869149	1.44394	23597637
ERR4029292_2	34.6985	1.26e-05	1.43811	23597637
ERR4029293_1	35.3103	0.00874193	1.31501	23360229
ERR4029293_2	34.9017	1.31e-05	1.31369	23360229
ERR4029294_1	35.3355	0.00882195	1.45291	22494848
ERR4029294_2	34.7668	1.14e-05	1.44999	22494848
ERR4982126_1	36.3028	0.00237093	3.55057	161750679
ERR4982126_2	36.1886	0.0021788	3.55567	161750679
ERR4982127_1	36.2971	0.00238054	3.67488	152608009
ERR4982127_2	36.2036	0.00218476	3.68096	152608009
ERR4982128_1	36.2741	0.00239373	3.89899	142642926
ERR4982128_2	36.2101	0.00219547	3.90607	142642926
ERR4982129_1	36.3199	0.00238711	3.32235	155997513
ERR4982129_2	36.211	0.00219598	3.32719	155997513
ERR4982130_1	36.2802	0.00238396	2.73644	219737960
ERR4982130_2	36.1425	0.0022006	2.74079	219737960
ERR4982131_1	36.2542	0.00239123	3.28141	169504889
ERR4982131_2	36.0982	0.00221029	3.28253	169504889
ERR4982132_1	36.247	0.00237929	3.01364	176422969
ERR4982132_2	36.0995	0.00218973	3.01803	176422969
ERR4982133_1	36.2483	0.00238839	3.35248	285611388
ERR4982133_2	36.1168	0.00220687	3.359	285611388
ERR4982134_1	36.2957	0.00237209	3.55643	174784289
ERR4982134_2	36.0764	0.00216921	3.56308	174784289
ERR4982135_1	36.2986	0.00235737	3.51236	180512547
ERR4982135_2	36.0963	0.00216778	3.51701	180512547
ERR4982136_1	36.2815	0.00237879	4.2435	156309904
ERR4982136_2	36.1198	0.00217792	4.25319	156309904
ERR4982137_1	36.2926	0.00237245	3.62047	169083504
ERR4982137_2	36.0953	0.00217585	3.62391	169083504
ERR5431657_1	35.7494	0.00438352	0.0756367	31958960
ERR5431657_2	35.4981	0.00343157	0.0788363	31958960
ERR5956391_1	35.9602	0.00294855	0.141723	15829925
ERR5956391_2	35.596	0.00562509	0.14132	15829925
ERR5956392_1	35.9436	0.00299897	0.173569	16504106
ERR5956392_2	35.5795	0.0058006	0.17278	16504106
ERR5956393_1	35.9427	0.00303909	0.166452	15282088
ERR5956393_2	35.6727	0.00583621	0.165861	15282088
ERR5956394_1	36.013	0.00438582	0.166488	19307426
ERR5956394_2	35.7609	0.0114122	0.166197	19307426
ERR5956395_1	35.9669	0.00293516	0.143039	22196249
ERR5956395_2	35.6202	0.00563438	0.142445	22196249
ERR5956396_1	35.9474	0.00302461	0.152527	17268320
ERR5956396_2	35.6	0.00578748	0.151833	17268320
ERR5956397_1	36.0085	0.00435464	0.130823	23402608
ERR5956397_2	35.6992	0.0115085	0.131081	23402608
ERR5956398_1	35.946	0.00300024	0.211971	16680398
ERR5956398_2	35.6052	0.00578009	0.210572	16680398
ERR5956399_1	35.9201	0.00294998	0.137996	15722859
ERR5956399_2	35.5709	0.00562999	0.137587	15722859
ERR5956400_1	35.3255	0.00155878	0.0920917	16973153
ERR5956400_2	34.5649	0.00299867	0.0884065	16973153
ERR5956401_1	35.9397	0.0030117	0.158162	18320652
ERR5956401_2	35.6716	0.00580355	0.158025	18320652
ERR5956402_1	35.935	0.0029926	0.145966	15965361
ERR5956402_2	35.618	0.00581492	0.144601	15965361
ERR5956403_1	35.9009	0.00281399	0.183794	16733857
ERR5956403_2	35.5464	0.00661936	0.18103	16733857
ERR5956404_1	35.9509	0.00295857	0.196716	23599802
ERR5956404_2	35.6943	0.0057271	0.194652	23599802
ERR5956405_1	35.9561	0.00297271	0.23988	21664776
ERR5956405_2	35.5291	0.00577399	0.237029	21664776
ERR5956406_1	36.2944	0.0031147	0.104389	17028272
ERR5956406_2	36.0176	0.000938408	0.104241	17028272
ERR5956407_1	35.9444	0.00295878	0.145441	18884567
ERR5956407_2	35.6553	0.0056558	0.14467	18884567
ERR5956408_1	35.9496	0.00297759	0.187399	15484073
ERR5956408_2	35.7221	0.00571157	0.186792	15484073
ERR6844365_1	37.3143	0.0293811	0.108641	18179988
ERR6844365_2	34.6177	0.0117514	0.122692	18179988
ERR6844366_1	37.3597	0.0291523	0.153281	16407886
ERR6844366_2	34.3222	0.0114978	0.160344	16407886
ERR6844367_1	37.4937	0.0290087	0.202457	16787529
ERR6844367_2	34.0505	0.0113223	0.197211	16787529
ERR6844368_1	37.3948	0.0297931	0.168578	16719189
ERR6844368_2	34.9314	0.0120309	0.169839	16719189
ERR6844369_1	37.3217	0.0284769	0.100407	17478179
ERR6844369_2	34.1238	0.0112014	0.105834	17478179
ERR6844370_1	37.435	0.0287142	0.137529	16537169
ERR6844370_2	34.6903	0.0112277	0.13332	16537169
ERR6844371_1	37.3937	0.029636	0.117356	21574472
ERR6844371_2	34.3756	0.0118212	0.120365	21574472
ERR6844372_1	37.288	0.0296519	0.109099	19942991
ERR6844372_2	33.5638	0.0118792	0.111361	19942991
ERR6844373_1	37.4753	0.029091	0.13526	18344823
ERR6844373_2	35.0081	0.0114341	0.141178	18344823
ERR6844374_1	37.3851	0.0290952	0.141178	17515951
ERR6844374_2	34.777	0.0115083	0.147456	17515951
ERR6844375_1	36.93	0.0292071	0.154356	20883814
ERR6844375_2	33.8518	0.0116628	0.157457	20883814
ERR6844376_1	37.0842	0.0285629	0.136708	16920047
ERR6844376_2	34.1924	0.0112634	0.147102	16920047
ERR6844377_1	37.1606	0.0293336	0.214475	23898107
ERR6844377_2	34.6274	0.0116366	0.218977	23898107
ERR6844378_1	37.4339	0.0298095	0.21922	15877333
ERR6844378_2	34.621	0.0118798	0.204304	15877333
ERR6844379_1	37.4253	0.0294197	0.120655	20218413
ERR6844379_2	34.9072	0.0116511	0.132088	20218413
ERR6844380_1	37.0983	0.0288579	0.139098	18256448
ERR6844380_2	33.5239	0.0114824	0.14416	18256448
ERR6844381_1	36.8782	0.0207493	0.35757	21805395
ERR6844381_2	32.7445	0.0136746	0.351276	21805395
ERR6844382_1	36.8864	0.0216635	0.507227	21535932
ERR6844382_2	32.4004	0.0141956	0.474786	21535932
ERR6844383_1	37.0749	0.0212024	0.319658	26394915
ERR6844383_2	32.7113	0.013877	0.314191	26394915
ERR6844384_1	36.9287	0.0208735	0.417357	30081190
ERR6844384_2	33.2189	0.0138462	0.403988	30081190
ERR6844385_1	36.9092	0.0212658	0.429814	28163466
ERR6844385_2	32.2078	0.0140344	0.418632	28163466
ERR6844386_1	37.0445	0.0224319	0.479055	32115286
ERR6844386_2	32.6887	0.0143675	0.461326	32115286
ERR6844387_1	37.2471	0.0230682	0.548781	33763759
ERR6844387_2	33.0435	0.0144728	0.514696	33763759
ERR6844388_1	36.4489	0.0204883	0.358615	22629902
ERR6844388_2	32.0222	0.0135128	0.339786	22629902
ERR6844389_1	37.3065	0.020515	0.370369	25508907
ERR6844389_2	33.2026	0.0138213	0.36525	25508907
ERR6844390_1	36.5087	0.019981	0.387677	22357032
ERR6844390_2	32.5333	0.0136166	0.384883	22357032
ERR6844391_1	35.488	0.0219895	0.530996	21973144
ERR6844391_2	31.5274	0.0140893	0.491281	21973144
ERR6844392_1	36.4252	0.0194415	0.375044	21460553
ERR6844392_2	32.6536	0.0133246	0.382848	21460553
ERR6869682_1	36.0995	0.00141648	0.0381749	37453175
ERR6869682_2	35.471	0.000114009	0.0389083	37453175
ERR6869683_1	36.2235	0.00139736	0.0177626	38631258
ERR6869683_2	35.9571	0.000112132	0.0179731	38631258
ERR6910584_1	36.0745	0.00152851	0.137742	37976697
ERR6910584_2	35.7112	0.00089961	0.139259	37976697
ERR6910585_1	36.2148	0.00153043	0.0964906	43821114
ERR6910585_2	35.8829	0.000895867	0.0982186	43821114
ERR6910586_1	36.156	0.00752749	0.133031	34041761
ERR6910586_2	35.9005	0.00160076	0.137361	34041761
ERR6910587_1	36.2382	0.0015449	0.0632342	35794856
ERR6910587_2	35.8984	0.000907716	0.0637246	35794856
ERR6910588_1	36.1387	0.0100625	0.128598	30901746
ERR6910588_2	35.8914	0.00210964	0.129411	30901746
ERR6910589_1	36.2451	0.00151935	0.15198	40791929
ERR6910589_2	35.9019	0.000887585	0.152169	40791929
ERR6910590_1	36.2113	0.00152521	0.090379	30304417
ERR6910590_2	35.9861	0.000892835	0.0911595	30304417
ERR6910591_1	36.1721	0.00998433	0.138072	32113638
ERR6910591_2	35.8415	0.00208652	0.138517	32113638
ERR6910592_1	36.2244	0.00151815	0.0851864	39556549
ERR6910592_2	35.837	0.000899977	0.0859716	39556549
ERR6910593_1	36.1517	0.00980776	0.0821007	31664772
ERR6910593_2	35.9065	0.00211321	0.0832391	31664772
ERR6910594_1	36.2367	0.00152287	0.0680151	41884317
ERR6910594_2	35.8446	0.000902348	0.0685333	41884317
ERR6910595_1	36.1884	0.00998923	0.0797741	30789005
ERR6910595_2	35.8399	0.00208983	0.0808457	30789005
ERR6910596_1	36.2386	0.00151093	0.088592	44571400
ERR6910596_2	35.9017	0.000879582	0.09024	44571400
ERR6910597_1	36.0917	0.00154035	0.10286	30566098
ERR6910597_2	35.6164	0.00091393	0.104484	30566098
ERR6910598_1	36.2384	0.00152903	0.0791861	34918635
ERR6910598_2	35.9959	0.000911593	0.0808437	34918635
ERR6910599_1	36.1865	0.00982258	0.109798	30245927
ERR6910599_2	35.9671	0.00206248	0.110455	30245927
ERR6910600_1	36.2353	0.00149059	0.0919647	46560768
ERR6910600_2	35.9167	0.000875099	0.0926354	46560768
ERR6910601_1	36.1692	0.0099777	0.0924814	29919500
ERR6910601_2	35.9513	0.00208954	0.0939206	29919500
ERR6910602_1	36.2289	0.0015014	0.0887204	41538624
ERR6910602_2	35.7758	0.000884085	0.0886331	41538624
ERR6910603_1	36.1868	0.00782539	0.0625901	32801123
ERR6910603_2	35.9242	0.00168834	0.0641069	32801123
ERR6910604_1	36.2237	0.00150902	0.0794841	32148344
ERR6910604_2	35.8725	0.000887154	0.0802203	32148344
ERR6910605_1	36.0279	0.00503147	0.118878	33050081
ERR6910605_2	35.5171	0.000527923	0.118796	33050081
ERR6910606_1	36.043	0.00477119	0.10022	31690627
ERR6910606_2	35.438	0.000509714	0.10025	31690627
ERR6910607_1	35.9407	0.00631134	0.0831741	30049940
ERR6910607_2	35.2109	0.000638884	0.0827915	30049940
ERR6910608_1	36.0361	0.0055239	0.110457	32418537
ERR6910608_2	35.4481	0.000586458	0.109763	32418537
ERR6910609_1	35.956	0.00654912	0.191665	29153138
ERR6910609_2	35.1176	0.000696251	0.187255	29153138
ERR6910610_1	35.9848	0.00645235	0.133943	29418158
ERR6910610_2	35.29	0.000639705	0.132785	29418158
ERR6910611_1	36.0313	0.00599457	0.121057	36062998
ERR6910611_2	35.4796	0.00122852	0.120246	36062998
ERR6910612_1	36.2664	0.000693455	0.275789	35546671
ERR6910612_2	35.7343	0.000315967	0.280554	35546671
ERR6910613_1	36.1387	0.00358501	0.149614	36002860
ERR6910613_2	35.6949	0.00120793	0.148863	36002860
ERR9715594_1	36.3026	0.00254545	0.125522	30277698
ERR9715594_2	36.0918	0.00153881	0.12637	30277698
ERR9715595_1	36.1199	0.00206509	0.309436	33041219
ERR9715595_2	35.9371	0.00321592	0.313163	33041219
ERR9715596_1	36.1585	0.00188816	0.133717	36288233
ERR9715596_2	35.8487	0.00126493	0.134271	36288233
ERR9715597_1	36.1886	0.000643885	0.105633	32144505
ERR9715597_2	35.7272	0.000352897	0.106169	32144505
ERR9715598_1	36.2941	0.00218528	0.190033	31465832
ERR9715598_2	35.998	0.00773675	0.196718	31465832
ERR9715599_1	36.0286	0.00246431	0.241641	32670211
ERR9715599_2	35.9881	0.00272357	0.250595	32670211
ERR9715600_1	36.0935	0.00248463	0.411275	30822279
ERR9715600_2	36.0605	0.0027772	0.417465	30822279
ERR9715601_1	36.3077	0.00237358	0.110421	31757088
ERR9715601_2	36.0657	0.00148752	0.111129	31757088
ERR9715602_1	36.0198	0.0021652	0.530831	33438690
ERR9715602_2	35.7948	0.00313499	0.55205	33438690
ERR9715603_1	35.9928	0.00211211	0.203096	34165380
ERR9715603_2	35.6421	0.00317661	0.207885	34165380
ERR9715604_1	36.0175	0.0021224	0.286505	33816242
ERR9715604_2	35.8562	0.0032041	0.293504	33816242
ERR9715605_1	36.0571	0.00217491	0.191284	33885975
ERR9715605_2	35.7728	0.00311045	0.194751	33885975
ERR9715606_1	36.0849	0.00230598	0.138103	32950319
ERR9715606_2	36.007	0.00297283	0.141038	32950319
ERR9715607_1	36.0277	0.00245994	0.502282	30554071
ERR9715607_2	36.1075	0.00273656	0.533676	30554071
ERR9715608_1	36.3163	0.00237505	0.11577	30009799
ERR9715608_2	36.12	0.00145402	0.117521	30009799
ERR9715609_1	36.0879	0.00204923	0.109838	34996693
ERR9715609_2	35.7936	0.00323076	0.111648	34996693
ERR9715610_1	36.0397	0.00227872	0.119552	33424865
ERR9715610_2	35.7173	0.00300136	0.121675	33424865
ERR9715611_1	36.3252	0.00241736	0.0552193	32376279
ERR9715611_2	36.0515	0.00654714	0.0568572	32376279
ERR9715612_1	36.0279	0.00231357	0.194723	33014664
ERR9715612_2	35.7897	0.00298274	0.197469	33014664
ERR9715613_1	36.0783	0.00223002	0.251708	33238501
ERR9715613_2	36.0207	0.00303847	0.256954	33238501
ERR9715614_1	36.0289	0.00212245	0.503539	33384413
ERR9715614_2	36.027	0.00315082	0.525419	33384413
ERR9715615_1	36.3154	0.00237199	0.119298	30194295
ERR9715615_2	36.1214	0.00146119	0.120503	30194295
ERR9715616_1	36.0468	0.0021185	0.223094	33640045
ERR9715616_2	35.9926	0.00315168	0.22726	33640045
ERR9715617_1	36.0309	0.00218987	0.209255	33637891
ERR9715617_2	35.7849	0.00312467	0.212239	33637891
ERR9715618_1	36.0121	0.00229181	0.199607	32474440
ERR9715618_2	35.9067	0.00294901	0.20667	32474440
ERR9715619_1	36.0248	0.00247543	0.301765	30129150
ERR9715619_2	35.7188	0.00275652	0.30752	30129150
ERR9715620_1	36.0728	0.00228912	0.138302	33895106
ERR9715620_2	35.7973	0.0029829	0.1436	33895106
ERR9715621_1	36.398	0.00237241	0.105354	33232915
ERR9715621_2	36.2259	0.00678492	0.106287	33232915
ERR9715622_1	36.3161	0.0026053	0.108447	30331250
ERR9715622_2	35.9525	0.00158294	0.10956	30331250
ERR9715623_1	36.0963	0.00227447	0.204149	32828743
ERR9715623_2	35.9333	0.00294706	0.207271	32828743
SRR10059725_1	34.2124	0.000354781	1.05e-05	16251679
SRR10059725_2	33.9743	0.000820408	9.12e-05	16251679
SRR10059726_1	34.2082	0.000342005	1.06e-05	16735679
SRR10059726_2	33.9274	0.000809021	5.11e-05	16735679
SRR10059727_1	34.2359	0.000347525	7.04e-06	15250707
SRR10059727_2	33.9765	0.000829005	9.98e-05	15250707
SRR10059728_1	34.181	0.000320921	9.86e-06	15399758
SRR10059728_2	33.9221	0.000792018	0.000113999	15399758
SRR10059729_1	34.192	0.000347052	1.23e-05	13808036
SRR10059729_2	33.8895	0.000780379	9.98e-05	13808036
SRR10059730_1	34.2159	0.000350959	7.48e-06	13871779
SRR10059730_2	33.9381	0.000813764	0.000100657	13871779
SRR10059731_1	34.3301	0.000322742	2.38e-05	14016425
SRR10059731_2	32.2339	0.00066701	0.000128685	14016425
SRR10059732_1	34.1734	0.000327801	1.8e-05	15188939
SRR10059732_2	33.9778	0.000784561	9.95e-05	15188939
SRR10083333_1	38.8866	0.0009757	0.000159546	31885284
SRR10083333_2	38.4661	0.000695333	0.000491903	31885284
SRR10083334_1	38.8512	0.000968638	0.000128087	28227304
SRR10083334_2	38.3049	0.000694809	0.000638566	28227304
SRR10168402_1	35.032	0.148765	0.00136342	49294372
SRR10168402_2	34.6324	0.0069738	0.00131995	49294372
SRR10168403_1	35.3211	0.152727	0.00686679	27049743
SRR10168403_2	35.0573	0.00721563	0.00700233	27049743
SRR10168404_1	34.9347	0.151105	0.00155285	82817199
SRR10168404_2	34.5136	0.00724753	0.0014887	82817199
SRR10168406_1	35.3093	0.148825	0.00342014	39753987
SRR10168406_2	35.0245	0.00703966	0.00367693	39753987
SRR10168407_1	35.2159	0.148612	0.0029612	8922528
SRR10168407_2	34.8908	0.00713373	0.00339293	8922528
SRR10215705_1	39.0151	0	0.000537013	25363033
SRR10215705_2	38.3106	0	0.00774592	25363033
SRR10215706_1	38.6383	0	0.000561868	23044504
SRR10215706_2	37.6675	0	0.00877286	23044504
SRR10215707_1	38.4719	0	0.000387353	24354475
SRR10215707_2	38.3024	0	0.00530379	24354475
SRR10215708_1	38.5601	0	0.000413021	25093621
SRR10215708_2	38.0987	0	0.00784457	25093621
SRR10215709_1	38.4599	0	0.000439763	25823176
SRR10215709_2	38.1406	0	0.00663512	25823176
SRR10215710_1	39.0377	0	0.000379332	24737626
SRR10215710_2	38.296	0	0.0102576	24737626
SRR10215711_1	38.6763	0	0.000391717	28597259
SRR10215711_2	37.6859	0	0.0108967	28597259
SRR10215712_1	38.525	0	0.000137937	23649579
SRR10215712_2	38.3155	0	0.00549307	23649579
SRR10215713_1	38.5602	0	0.000329867	24211268
SRR10215713_2	38.2129	0	0.00951548	24211268
SRR10215714_1	38.9906	0	0.000250376	28651465
SRR10215714_2	38.0534	0	0.00502979	28651465
SRR10215715_1	38.9865	0	0.000737265	24566687
SRR10215715_2	38.3237	0	0.00821237	24566687
SRR10215716_1	38.5024	0	0.000814534	23961632
SRR10215716_2	37.0708	0	0.0143369	23961632
SRR10215717_1	38.3651	0	0.000323781	24278145
SRR10215717_2	38.1361	0	0.0084115	24278145
SRR10215718_1	38.5167	0	0.000437381	27865467
SRR10215718_2	38.0562	0	0.0105542	27865467
SRR10215719_1	38.7042	0	0.000426342	30496717
SRR10215719_2	38.1704	0	0.00829048	30496717
SRR10215720_1	38.9713	0	0.000878126	26549152
SRR10215720_2	38.3003	0	0.010053	26549152
SRR10215721_1	38.5808	0	0.00105259	26597123
SRR10215721_2	37.5525	0	0.00962919	26597123
SRR10215722_1	38.3916	0	0.000383289	25621076
SRR10215722_2	38.2458	0	0.00846998	25621076
SRR10215723_1	38.5351	0	0.000537194	28708986
SRR10215723_2	38.0536	0	0.00836707	28708986
SRR10215724_1	38.5723	0	0.00057449	27859020
SRR10215724_2	38.0656	0	0.0100905	27859020
SRR10215725_1	38.9882	0	0.000761765	22832833
SRR10215725_2	38.3711	0	0.010287	22832833
SRR10215726_1	38.5658	0	0.000665996	26636576
SRR10215726_2	37.5359	0	0.0129869	26636576
SRR10215727_1	38.4283	0	0.000438477	26438273
SRR10215727_2	38.1232	0	0.00890905	26438273
SRR10215728_1	38.4072	0	0.000300257	25363377
SRR10215728_2	38.2885	0	0.00693714	25363377
SRR10215729_1	38.6065	0	0.000590042	27104113
SRR10215729_2	38.2802	0	0.00899305	27104113
SRR10267215_1	36.0284	0.00196769	0.473922	67788880
SRR10267215_2	36.0939	0.000277448	0.478437	67788880
SRR10267216_1	35.9936	0.00196389	0.912113	79421150
SRR10267216_2	35.6697	0.000285354	0.911937	79421150
SRR10292033_1	36.0847	0.00197091	2.539	39144713
SRR10292033_2	35.9861	0.000315926	2.5467	39144713
SRR10292034_1	36.0998	0.0019604	2.67272	40259580
SRR10292034_2	36.0818	0.000313335	2.69506	40259580
SRR10292035_1	36.1161	0.00198426	2.06297	38775828
SRR10292035_2	35.9003	0.000322067	2.08434	38775828
SRR10292036_1	35.927	0.00195625	2.05949	31946943
SRR10292036_2	35.9625	0.000278192	2.08387	31946943
SRR10292037_1	36.0812	0.00197122	1.21069	54838877
SRR10292037_2	35.9522	0.000315546	1.21755	54838877
SRR10292038_1	35.9395	0.0019736	0.643658	34957920
SRR10292038_2	35.8863	0.000288512	0.651252	34957920
SRR10292039_1	36.1181	0.00198845	2.20988	41315222
SRR10292039_2	36.061	0.00032761	2.23387	41315222
SRR10292040_1	36.1251	0.0019792	1.92353	46649484
SRR10292040_2	36.0167	0.000317925	1.9336	46649484
SRR10292041_1	36.0477	0.00197845	2.87734	34652833
SRR10292041_2	35.9987	0.000314442	2.89139	34652833
SRR10292042_1	36.13	0.00197174	1.43928	39758361
SRR10292042_2	36.0851	0.000317616	1.45088	39758361
SRR10292043_1	35.8955	0.00195634	2.25876	34528806
SRR10292043_2	35.7042	0.000276443	2.28354	34528806
SRR10292044_1	35.9433	0.00197616	0.670083	41331431
SRR10292044_2	35.934	0.000286592	0.677841	41331431
SRR10292045_1	35.9591	0.00197407	0.381578	47673434
SRR10292045_2	35.852	0.000285131	0.380118	47673434
SRR10292046_1	36.1094	0.00197837	1.87245	43468910
SRR10292046_2	35.9786	0.00031495	1.88512	43468910
SRR10292047_1	35.9718	0.00196835	0.376965	40412102
SRR10292047_2	35.9814	0.00028212	0.381568	40412102
SRR10292048_1	35.9114	0.00195518	1.92641	39293896
SRR10292048_2	35.9463	0.000283947	1.92368	39293896
SRR10292049_1	35.966	0.00198005	0.445463	39874706
SRR10292049_2	36.0157	0.000281817	0.451366	39874706
SRR10292050_1	36.1027	0.00198687	1.70743	40043829
SRR10292050_2	35.9902	0.000333897	1.7153	40043829
SRR10292051_1	35.9103	0.00195212	2.22585	31425972
SRR10292051_2	35.865	0.00028009	2.24999	31425972
SRR10292052_1	36.1069	0.00198661	2.26238	31010339
SRR10292052_2	35.9503	0.000316991	2.27392	31010339
SRR10292053_1	36.0295	0.00196723	1.76661	29583385
SRR10292053_2	35.9159	0.000322051	1.7728	29583385
SRR10292054_1	35.9103	0.00196374	1.47592	36968676
SRR10292054_2	35.8092	0.000279255	1.49525	36968676
SRR10292055_1	35.9543	0.00197095	0.549371	37324806
SRR10292055_2	35.8227	0.000283528	0.552515	37324806
SRR10292056_1	35.9521	0.00197747	0.408553	41183058
SRR10292056_2	35.9857	0.000275969	0.414516	41183058
SRR10292057_1	36.1222	0.00200441	2.43995	37902914
SRR10292057_2	36.0875	0.000323736	2.46557	37902914
SRR10292058_1	35.9052	0.00197513	1.87161	35207351
SRR10292058_2	35.8748	0.000291192	1.88513	35207351
SRR10292059_1	35.9581	0.00197459	0.46381	41288618
SRR10292059_2	35.8685	0.000283384	0.468455	41288618
SRR10292060_1	36.1004	0.00198899	2.36383	37576570
SRR10292060_2	35.9005	0.000320903	2.38429	37576570
SRR10357936_1	36.0944	0.00238442	0.0006478	22932075
SRR10357936_2	35.9027	0.00199046	0.00212275	22932075
SRR10357937_1	36.144	0.00241688	0.000739059	24582024
SRR10357937_2	36.1529	0.00195844	0.00174603	24582024
SRR10357938_1	36.1822	0.0023737	0.000563911	26071517
SRR10357938_2	36.1741	0.00195572	0.00163047	26071517
SRR10357939_1	36.2033	0.00239084	0.000773194	26157724
SRR10357939_2	36.1701	0.00193698	0.00171184	26157724
SRR10357940_1	35.2338	0.00122953	0.000208286	21821696
SRR10357940_2	34.1154	0.000572167	0.000152556	21821696
SRR10357941_1	34.5821	0.00131575	0.000241204	20926605
SRR10357941_2	32.9188	0.0005367	0.000236425	20926605
SRR10357942_1	39.2439	0.00138808	0.000224607	22731423
SRR10357942_2	37.7461	9.76e-05	0.00208405	22731423
SRR10357943_1	39.4088	0.00142158	0.000262574	23861189
SRR10357943_2	38.0784	0.000101629	0.00130608	23861189
SRR10357944_1	35.6371	0.00149943	0.000253386	19923730
SRR10357944_2	34.9233	0.00153133	0.000422134	19923730
SRR10426374_1	38.7802	0.0109526	0.0754447	26348616
SRR10426374_2	37.8739	0.00227705	0.084273	26348616
SRR10426375_1	38.8042	0.0107978	0.086454	22950944
SRR10426375_2	37.8827	0.00226021	0.0961113	22950944
SRR10426376_1	38.7737	0.0112516	0.0782856	21211976
SRR10426376_2	37.7884	0.00228805	0.0873917	21211976
SRR10426377_1	38.9142	0.00346802	0.0814521	30169037
SRR10426377_2	37.8125	0.000107943	0.067688	30169037
SRR10426378_1	38.9129	0.00473027	0.0805413	26703275
SRR10426378_2	37.4223	0.00581505	0.0959779	26703275
SRR10426379_1	38.8388	0.00353536	0.0905684	21822516
SRR10426379_2	37.3547	0.00205222	0.0787619	21822516
SRR10426380_1	38.8481	0.00354282	0.0834278	24144602
SRR10426380_2	37.1788	0.00205695	0.0750007	24144602
SRR10426381_1	38.8283	0.0164747	0.0775417	25956427
SRR10426381_2	38.0001	0.00405218	0.0648791	25956427
SRR10426382_1	38.745	0.0104793	0.0749	23426162
SRR10426382_2	37.7562	0.00217073	0.0857097	23426162
SRR10426383_1	38.801	0.0108131	0.057098	24112433
SRR10426383_2	37.8781	0.00226381	0.0656908	24112433
SRR10426384_1	38.8341	0.0157046	0.0789435	23415218
SRR10426384_2	37.9555	0.003604	0.0654104	23415218
SRR10426385_1	38.7958	0.0134704	0.0783274	23544239
SRR10426385_2	37.8839	0.00437206	0.0656493	23544239
SRR10453914_1	37.5815	0.0027936	8.38295	43585817
SRR10453914_2	36.4819	0.120185	8.32011	43585817
SRR10453915_1	37.5489	0.00280438	8.28424	40666713
SRR10453915_2	36.1466	0.120291	8.17367	40666713
SRR10453916_1	37.5145	0.00275692	8.39412	45506484
SRR10453916_2	36.1549	0.119392	8.30954	45506484
SRR10453917_1	37.8114	0.00276698	6.65045	44747715
SRR10453917_2	36.6636	0.120263	6.62304	44747715
SRR10453918_1	37.6862	0.00278644	6.25382	46191239
SRR10453918_2	36.4892	0.120066	6.19824	46191239
SRR10453919_1	36.4098	0.00275889	16.1731	51932471
SRR10453919_2	35.1864	0.119631	16.0448	51932471
SRR10512805_1	33.4852	0.000682261	1.1677	30878867
SRR10512805_2	32.1491	0.00573633	1.1183	30878867
SRR10512806_1	33.4905	0.000687969	1.70881	21832049
SRR10512806_2	31.8661	0.00576478	1.61911	21832049
SRR10512807_1	33.4416	0.000688344	0.959623	25112529
SRR10512807_2	32.3245	0.00574405	0.905083	25112529
SRR10512808_1	33.4751	0.000705528	1.17153	25277123
SRR10512808_2	32.1815	0.00581199	1.11516	25277123
SRR10512809_1	33.5259	0.000707042	1.16911	18016428
SRR10512809_2	32.2216	0.00592257	1.13254	18016428
SRR10512818_1	33.439	0.00069603	1.41051	23149548
SRR10512818_2	32.0714	0.00566554	1.36374	23149548
SRR10512829_1	34.1566	0.000497537	0.603757	25422923
SRR10512829_2	33.0347	0.00240316	0.586924	25422923
SRR10512840_1	34.1877	0.000498838	0.816177	24414858
SRR10512840_2	32.327	0.00239932	0.762122	24414858
SRR10512845_1	33.4498	0.000678006	1.72638	24601880
SRR10512845_2	32.0991	0.00565078	1.66782	24601880
SRR10512846_1	33.5166	0.000686995	1.40462	27374024
SRR10512846_2	32.238	0.0057682	1.37575	27374024
SRR10512847_1	33.5279	0.000650502	1.28005	29889268
SRR10512847_2	32.5372	0.00561258	1.25647	29889268
SRR10512848_1	33.3218	0.000644375	1.74779	24534328
SRR10512848_2	31.703	0.00535368	1.69625	24534328
SRR10512849_1	33.3401	0.000709156	2.23902	23314643
SRR10512849_2	31.6548	0.00581175	2.19163	23314643
SRR10512850_1	33.4329	0.000726742	3.53744	29222500
SRR10512850_2	31.0004	0.00617906	3.46361	29222500
SRR10512851_1	34.1899	0.00049743	0.350534	25437751
SRR10512851_2	33.3721	0.00232844	0.339728	25437751
SRR10512852_1	34.1616	0.000494381	0.455263	29903514
SRR10512852_2	33.2359	0.00234712	0.435775	29903514
SRR10533934_1	39.5594	0.00952109	0.00592454	9128087
SRR10533934_2	38.0061	0.00878417	0.0105759	9128087
SRR10533935_1	39.4147	0.00950822	0.00610942	6433454
SRR10533935_2	37.9146	0.000831901	0.0111213	6433454
SRR10574515_1	34.3809	0.035317	1.67418	15645067
SRR10574515_2	31.0669	0.507983	3.55351	15645067
SRR10574516_1	35.5448	0.072437	0.332138	17069594
SRR10574516_2	29.7425	5.77059	0.253039	17069594
SRR10574517_1	33.8226	0.0786394	0.740503	22024352
SRR10574517_2	26.8911	0.91772	0.488388	22024352
SRR10574518_1	35.4012	0.0572593	0.330279	19903190
SRR10574518_2	29.9676	5.42225	0.256296	19903190
SRR10590114_1	35.8735	0.0212761	0.000475994	15993544
SRR10590114_2	35.5403	0.000679649	0.0132512	15993544
SRR10606775_1	36.0498	0.0011597	3.515	19788225
SRR10606775_2	35.639	0.000890803	3.68189	19788225
SRR10606776_1	36.0046	0.00116563	3.85155	16404512
SRR10606776_2	35.6505	0.000898276	3.83066	16404512
SRR10606777_1	36.1348	0.00116705	3.11896	18853643
SRR10606777_2	35.6076	0.000913782	3.02991	18853643
SRR10606778_1	36.0596	0.00114933	4.23587	15921022
SRR10606778_2	35.7087	0.000894835	4.41875	15921022
SRR10606779_1	36.1047	0.00116273	3.45905	18697428
SRR10606779_2	35.6502	0.00089457	3.64469	18697428
SRR10606780_1	36.0646	0.00114734	4.1643	18762420
SRR10606780_2	35.6615	0.000898663	4.08931	18762420
SRR10606781_1	36.1458	0.00114954	3.6886	18753454
SRR10606781_2	35.5755	0.000901248	3.79352	18753454
SRR10606782_1	36.0854	0.00114766	4.62538	18785205
SRR10606782_2	35.6479	0.000892233	4.77406	18785205
SRR10724072_1	35.7602	0	0.000122881	24197301
SRR10724072_2	34.9296	0	0.000202569	24197301
SRR10724073_1	35.8764	0	0.000148774	25439075
SRR10724073_2	34.9688	0	0.000161106	25439075
SRR10724074_1	35.8053	0	0.000143538	26524303
SRR10724074_2	34.9401	0	0.00016698	26524303
SRR10724080_1	35.7168	0	0.000110632	30666971
SRR10724080_2	34.5865	0	0.000142267	30666971
SRR10724081_1	35.5973	0	0.000117234	35316889
SRR10724081_2	34.8942	0	0.00026011	35316889
SRR10724083_1	35.6342	0	0.000177567	29670706
SRR10724083_2	34.9122	0	0.000272399	29670706
SRR10724084_1	35.6459	0	0.000148724	30962316
SRR10724084_2	34.9911	0	0.000280101	30962316
SRR10724085_1	35.6413	0	0.000124194	27675232
SRR10724085_2	34.8953	0	0.000257217	27675232
SRR10724086_1	35.7295	0	0.000163134	28464656
SRR10724086_2	35.0487	0	0.000144095	28464656
SRR10724087_1	35.7898	0	0.000144093	26612452
SRR10724087_2	35.0326	0	0.000138608	26612452
SRR10724088_1	35.847	0	0.000113808	28967748
SRR10724088_2	34.7817	0	0.000125668	28967748
SRR10724089_1	35.6989	0	0.000138611	29695442
SRR10724089_2	34.7544	0	0.000165443	29695442
SRR10740658_1	35.5736	0.000654874	0.255761	41447258
SRR10740658_2	34.6621	0.00152057	0.239859	41447258
SRR10740659_1	35.6043	0.000673645	0.217266	37848381
SRR10740659_2	34.9846	0.00153918	0.219723	37848381
SRR10740660_1	35.5838	0.000652443	0.214735	37343534
SRR10740660_2	35.0157	0.00150047	0.212341	37343534
SRR10740661_1	35.487	0.000674023	0.389048	41567215
SRR10740661_2	34.8282	0.00153272	0.386339	41567215
SRR10740662_1	35.6109	0.000648434	0.229605	41605133
SRR10740662_2	34.6583	0.0014713	0.218721	41605133
SRR10740663_1	35.6254	0.000652839	0.181088	34583231
SRR10740663_2	35.1566	0.00145031	0.182563	34583231
SRR10740664_1	35.6125	0.000660865	0.221292	42682339
SRR10740664_2	35.0008	0.00154316	0.219628	42682339
SRR10740665_1	35.5848	0.000674758	0.203655	35632958
SRR10740665_2	34.9562	0.00153645	0.203974	35632958
SRR10740666_1	35.5853	0.00064792	0.225225	37165110
SRR10740666_2	34.7205	0.00149747	0.222588	37165110
SRR10740667_1	35.5973	0.000647666	0.219891	37575475
SRR10740667_2	34.8716	0.00150662	0.20773	37575475
SRR10740668_1	35.6224	0.000632539	0.221712	39182647
SRR10740668_2	35.0124	0.00142716	0.221458	39182647
SRR10740669_1	35.6243	0.000678713	0.20012	38390853
SRR10740669_2	35.1785	0.00157997	0.18964	38390853
SRR10740670_1	35.5915	0.000660764	0.200237	36741191
SRR10740670_2	35.032	0.0015147	0.188863	36741191
SRR10740671_1	35.6379	0.000669112	0.222132	44574691
SRR10740671_2	34.9952	0.00152555	0.223914	44574691
SRR10740672_1	35.6242	0.000668918	0.222091	47920016
SRR10740672_2	35.0944	0.00153098	0.224901	47920016
SRR10740673_1	35.6352	0.000672526	0.186608	41306981
SRR10740673_2	35.2261	0.00156375	0.186199	41306981
SRR10740674_1	35.6043	0.000675545	0.210511	37619481
SRR10740674_2	34.9154	0.00155203	0.216969	37619481
SRR10740675_1	35.6295	0.00066417	0.225516	36418635
SRR10740675_2	34.8632	0.00154302	0.212829	36418635
SRR10740676_1	35.6293	0.000659994	0.220207	42026533
SRR10740676_2	34.9743	0.00149702	0.216603	42026533
SRR10740677_1	35.6308	0.000652373	0.223377	33295210
SRR10740677_2	34.9442	0.0014968	0.220497	33295210
SRR10740678_1	35.6526	0.000651313	0.215428	39832820
SRR10740678_2	35.0714	0.00152816	0.215884	39832820
SRR10740679_1	35.6276	0.000687921	0.239779	47740661
SRR10740679_2	35.0157	0.00159709	0.238385	47740661
SRR10740680_1	35.502	0.000653984	0.414162	33752563
SRR10740680_2	34.9034	0.00153526	0.412475	33752563
SRR10740681_1	35.5981	0.000656083	0.227514	40255446
SRR10740681_2	35.0236	0.00150076	0.225428	40255446
SRR10740682_1	35.6178	0.000688736	0.190883	42915250
SRR10740682_2	35.2758	0.00155137	0.196464	42915250
SRR10740683_1	35.6055	0.000665168	0.246177	41178948
SRR10740683_2	34.8195	0.00152033	0.229872	41178948
SRR10740684_1	35.6116	0.000666872	0.244682	45416947
SRR10740684_2	34.8161	0.00153947	0.244072	45416947
SRR10852797_1	37.0073	0.000377357	0.00095063	33300442
SRR10852797_2	36.8116	0.00221039	0.00100499	33300442
SRR11035213_1	37.811	0.042557	0.00135492	114959440
SRR11035213_2	37.3036	0.000268091	0.000767894	114959440
SRR11035214_1	38.2375	0.0981999	0.000230455	122380410
SRR11035214_2	37.6884	0.000358615	0.000154092	122380410
SRR11035215_1	37.9606	0.0116478	0.00104867	149982204
SRR11035215_2	37.4207	0.000973927	0.00149593	149982204
SRR11035216_1	37.9532	0.00227159	0.00091095	154299841
SRR11035216_2	37.4887	0.000871463	0.00136108	154299841
SRR11050685_1	34.1349	0.0178656	3.3873	31027910
SRR11050685_2	33.9699	0.00183693	3.39217	31027910
SRR11050686_1	33.9229	0.0175085	1.12967	19612809
SRR11050686_2	33.7317	0.00181596	1.14411	19612809
SRR11050687_1	33.9322	0.017722	1.82718	22913419
SRR11050687_2	33.7354	0.00181323	1.83369	22913419
SRR11148845_1	34.6526	0.192277	0.0706833	12082098
SRR11148845_2	34.786	0.0990049	0.0742304	12082098
SRR11148847_1	34.9583	0.192341	0.0855069	17748228
SRR11148847_2	34.8722	0.102032	0.090593	17748228
SRR11148848_1	34.9559	0.00398809	0.583965	13442308
SRR11148848_2	34.8081	0.097372	0.589667	13442308
SRR11148849_1	35.0158	0.00361611	0.299586	17081143
SRR11148849_2	34.7644	0.101959	0.317507	17081143
SRR11148850_1	34.5186	0.191773	0.0400306	17460631
SRR11148850_2	34.5446	0.0960564	0.0443364	17460631
SRR11148851_1	35.1505	0.003614	0.0910886	11843329
SRR11148851_2	34.9044	0.100201	0.0938877	11843329
SRR11148852_1	35.2234	0.00398275	0.042106	24024981
SRR11148852_2	35.0534	0.0972795	0.0432146	24024981
SRR11148853_1	34.6869	0.105821	0.00877156	24342934
SRR11148853_2	34.7042	0.0943182	0.00911684	24342934
SRR11148854_1	35.0856	0.0294187	0.0134528	16645176
SRR11148854_2	35.0053	0.0728708	0.0137359	16645176
SRR11148855_1	34.8019	0.192458	0.0976349	40792153
SRR11148855_2	34.7562	0.0995956	0.103138	40792153
SRR11148856_1	35.1571	0.00398453	0.0105588	13453410
SRR11148856_2	35.0359	0.095906	0.01069	13453410
SRR11148858_1	35.0678	0.00349168	0.136581	16689800
SRR11148858_2	34.6636	0.0657128	0.142008	16689800
SRR11301087_1	37.6009	0.00323617	0.00285401	21544145
SRR11301087_2	37.43	0.00232262	0.00195287	21544145
SRR11301088_1	36.0749	0	0.00351012	21232235
SRR11301088_2	35.8434	0	0.00248574	21232235
SRR11301089_1	37.269	0.006345	0.0786824	27477642
SRR11301089_2	36.9921	0.00233302	0.0999544	27477642
SRR11301090_1	37.6006	0.000419738	0.0033034	26245713
SRR11301090_2	37.592	0.00112654	0.00206242	26245713
SRR11301091_1	37.4965	0.00322047	0.00223165	32937689
SRR11301091_2	37.4349	0.00234628	0.00249371	32937689
SRR11546941_1	33.2479	0.098744	0.096138	64356409
SRR11546941_2	32.8225	0.166111	0.100691	64356409
SRR11546949_1	31.5117	0.0964999	0.152961	64073449
SRR11546949_2	31.0754	0.152071	0.144362	64073449
SRR11744112_1	40.2896	0.0342498	4e-05	25365090
SRR11744112_2	40.1622	0.0118144	1.98e-05	25365090
SRR11744113_1	40.4359	6.41e-05	2.87e-05	24228484
SRR11744113_2	40.2728	0.00180039	2.27e-05	24228484
SRR11744114_1	40.5067	0.000105195	1.72e-05	25696645
SRR11744114_2	40.2189	0.0138935	1.4e-05	25696645
SRR11744115_1	40.4363	6.35e-05	5.36e-05	25030735
SRR11744115_2	40.2081	0.00166226	4.23e-05	25030735
SRR11744116_1	40.3179	6.29e-05	3.22e-05	28496747
SRR11744116_2	40.2718	0.0016475	4.65e-05	28496747
SRR11744117_1	40.4428	0.000166873	2.99e-05	34373340
SRR11744117_2	40.2111	0.00114479	3.34e-05	34373340
SRR11744118_1	40.3905	0.248587	1.2e-05	33514621
SRR11744118_2	40.2753	0.00325585	1.67e-05	33514621
SRR11744119_1	40.4527	0.000104389	3.78e-05	24157541
SRR11744119_2	40.2012	0.0136959	2.05e-05	24157541
SRR11744120_1	40.4509	6.34e-05	6.88e-05	27499647
SRR11744120_2	40.2724	0.00182314	9.65e-05	27499647
SRR11744121_1	40.4264	6.69e-05	5.29e-05	29802101
SRR11744121_2	40.3057	0.00187857	3.43e-05	29802101
SRR11744122_1	40.377	0.00740101	4.88e-05	23372001
SRR11744122_2	40.0917	0.00585203	2.67e-05	23372001
SRR11744123_1	40.446	0.0076943	2.59e-05	22706988
SRR11744123_2	40.1273	0.00582381	8.95e-06	22706988
SRR11744124_1	40.4207	0.00767241	2.17e-05	25801687
SRR11744124_2	40.175	0.00586815	5.04e-05	25801687
SRR11744125_1	40.3703	0.0038245	6.78e-05	31967100
SRR11744125_2	40.177	0.00145276	6.51e-05	31967100
SRR11744126_1	40.3704	0.00509794	1.41e-05	25613663
SRR11744126_2	40.1756	0.00142553	2.26e-05	25613663
SRR11744127_1	40.4275	0.0344535	2.49e-05	29464748
SRR11744127_2	40.241	0.0119212	3.01e-05	29464748
SRR11744128_1	40.3791	0.249832	2.03e-05	25449465
SRR11744128_2	40.1842	0.00290902	1.11e-05	25449465
SRR11744129_1	40.3619	0.248036	1.85e-05	27125953
SRR11744129_2	40.2367	0.00305655	2.42e-05	27125953
SRR11744130_1	40.4708	0.0339443	3.2e-05	28845146
SRR11744130_2	40.0649	0.0116094	2.71e-05	28845146
SRR11744131_1	40.4418	0.0342289	4.78e-05	29550914
SRR11744131_2	40.1983	0.0118184	2.76e-05	29550914
SRR11744132_1	40.3763	0.00504944	2.82e-05	27855572
SRR11744132_2	40.193	0.00145508	3.26e-05	27855572
SRR11744133_1	40.3679	0.00382368	3.7e-05	21608551
SRR11744133_2	40.1803	0.00140844	4.3e-05	21608551
SRR11744134_1	40.4068	0.250487	2.39e-05	24485928
SRR11744134_2	40.0925	0.00255374	4.27e-05	24485928
SRR11744135_1	40.44	0.00770853	3.3e-05	30732270
SRR11744135_2	40.1505	0.00584943	2.59e-05	30732270
SRR11744136_1	40.3774	0.248265	2.77e-05	29319953
SRR11744136_2	40.2358	0.00306152	4.01e-05	29319953
SRR11744137_1	40.4369	4.25e-05	4.13e-05	24272004
SRR11744137_2	40.2829	0.00155174	3.68e-05	24272004
SRR11744138_1	40.4402	4.37e-05	4.62e-05	24726261
SRR11744138_2	40.2672	0.00150523	2.84e-05	24726261
SRR11744139_1	40.4218	0.00765835	3.19e-05	28153988
SRR11744139_2	40.1886	0.00589969	2.6e-05	28153988
SRR11744140_1	40.4213	0.0076569	3.22e-05	27971216
SRR11744140_2	40.1765	0.00588719	3.88e-05	27971216
SRR11744141_1	40.4946	0.000109945	3.97e-05	26843151
SRR11744141_2	40.2405	0.0139077	4.38e-05	26843151
SRR11806428_1	35.6652	0.00467845	0.33524	22580991
SRR11806428_2	35.2328	0.106941	0.312569	22580991
SRR11806429_1	35.7198	0.00475423	0.100791	22638659
SRR11806429_2	35.2252	0.109186	0.0933943	22638659
SRR11806430_1	35.6826	0.00466872	0.201701	24234782
SRR11806430_2	35.2861	0.108685	0.186143	24234782
SRR11825055_1	36.0605	0.00166269	0.371062	22432599
SRR11825055_2	35.8549	0.000299822	0.377181	22432599
SRR11825056_1	36.0773	0.00163841	0.395736	30187852
SRR11825056_2	36.0283	0.000328034	0.404023	30187852
SRR11829262_1	36.0396	0.000216711	0.000778989	34397486
SRR11829262_2	35.9938	0.000968621	0.00137215	34397486
SRR11829263_1	36.0472	0.000222177	0.000535996	34484915
SRR11829263_2	35.9592	0.000993642	0.00112215	34484915
SRR11829264_1	36.0483	0.000222843	0.000850632	37610363
SRR11829264_2	35.7833	0.000980291	0.0015251	37610363
SRR11829265_1	36.0327	0.000213054	0.00048412	40529068
SRR11829265_2	35.9281	0.000989935	0.00121636	40529068
SRR11829266_1	36.0545	0.000227625	0.00097696	31818906
SRR11829266_2	36.0381	0.00101081	0.00154678	31818906
SRR11829267_1	36.063	0.000218478	0.0018593	41144073
SRR11829267_2	35.853	0.00098682	0.00228989	41144073
SRR11851450_1	38.3421	0.0230654	0.650042	12045654
SRR11851450_2	36.6814	0.016352	0.708272	12045654
SRR11851451_1	38.3368	0.0230022	0.418246	15689666
SRR11851451_2	36.6497	0.0162858	0.494187	15689666
SRR11851452_1	38.371	0.0227852	0.867597	12147078
SRR11851452_2	36.7625	0.0162446	0.922117	12147078
SRR11851453_1	38.3823	0.0227233	0.868441	11819523
SRR11851453_2	36.9258	0.0161893	0.926598	11819523
SRR11851454_1	38.3745	0.022924	0.497468	11779229
SRR11851454_2	36.6055	0.0161933	0.556177	11779229
SRR11851455_1	38.3421	0.0225917	0.454404	10924350
SRR11851455_2	36.6476	0.0160736	0.50744	10924350
SRR11851456_1	38.3507	0.0230472	0.428294	11595806
SRR11851456_2	36.4903	0.0162946	0.489355	11595806
SRR11851457_1	38.3493	0.0226897	0.394861	11690392
SRR11851457_2	36.5989	0.0161609	0.448798	11690392
SRR11851458_1	38.3721	0.0229852	0.596306	13186952
SRR11851458_2	36.6829	0.016304	0.6786	13186952
SRR11851459_1	38.0441	0.0240609	0.549521	14884518
SRR11851459_2	36.8402	0.0190054	0.58971	14884518
SRR11951638_1	38.2988	0.0112387	4.40706	49159077
SRR11951638_2	37.3552	0.0349588	4.34815	49159077
SRR11951639_1	38.0624	0.0405536	6.30223	58244786
SRR11951639_2	36.4699	0.061064	6.18296	58244786
SRR11951640_1	38.0817	0.0407165	6.74859	36981606
SRR11951640_2	36.7349	0.0611468	6.64203	36981606
SRR11951641_1	38.2493	0.0114681	4.70179	46306667
SRR11951641_2	37.3671	0.0352203	4.63357	46306667
SRR11951642_1	38.3029	0.0115704	4.75353	39724374
SRR11951642_2	37.3036	0.0355355	4.676	39724374
SRR11951643_1	38.0026	0.040908	6.28772	44607861
SRR11951643_2	36.5917	0.0613722	6.17917	44607861
SRR11951644_1	38.1478	0.0408418	8.50153	47894103
SRR11951644_2	36.9628	0.0612558	8.35667	47894103
SRR12015839_1	35.7369	0.0199462	1.10046	18811586
SRR12015839_2	35.2088	0.0141599	1.08976	18811586
SRR12015840_1	35.7491	0.0199078	0.978053	15762242
SRR12015840_2	35.3164	0.0139452	0.968152	15762242
SRR12015841_1	35.7863	0.020116	0.873649	13230321
SRR12015841_2	35.1785	0.0142561	0.860239	13230321
SRR12015842_1	35.612	0.00797952	0.90955	12723748
SRR12015842_2	35.2609	0.0120401	0.898303	12723748
SRR12015843_1	35.7982	0.0078905	0.349702	14543001
SRR12015843_2	35.2321	0.0121373	0.34249	14543001
SRR12015844_1	35.8084	0.00783265	0.587764	14127234
SRR12015844_2	35.1728	0.0119948	0.579773	14127234
SRR12015845_1	35.8494	0.00798614	0.912907	13373906
SRR12015845_2	35.4334	0.0118929	0.907806	13373906
SRR12015846_1	35.758	0.0200013	1.17663	15850220
SRR12015846_2	35.2576	0.0140464	1.16566	15850220
SRR12015847_1	35.7049	0.0200489	0.596338	14995038
SRR12015847_2	35.2166	0.0141347	0.582519	14995038
SRR12015848_1	35.6802	0.020077	0.586221	13297805
SRR12015848_2	35.1445	0.0138324	0.575889	13297805
SRR12015849_1	35.813	0.0197459	1.42325	13572788
SRR12015849_2	35.1435	0.0141609	1.40913	13572788
SRR12015850_1	35.8361	0.00765411	0.982161	13108011
SRR12015850_2	35.3628	0.0119657	0.977047	13108011
SRR12015851_1	35.7614	0.019779	0.805927	16341758
SRR12015851_2	35.2661	0.0140768	0.79587	16341758
SRR12015852_1	35.7771	0.0199077	0.879079	14101009
SRR12015852_2	35.2208	0.0138741	0.86915	14101009
SRR12015853_1	35.7803	0.019926	0.937468	16248388
SRR12015853_2	35.2163	0.0139512	0.928277	16248388
SRR12015854_1	35.8239	0.00811486	0.851083	17285378
SRR12015854_2	35.2792	0.0122901	0.842383	17285378
SRR12015855_1	35.8191	0.00784742	0.759561	14386993
SRR12015855_2	35.3017	0.0121876	0.757204	14386993
SRR12015856_1	35.8356	0.0079161	0.795759	15167807
SRR12015856_2	35.3457	0.0122316	0.788239	15167807
SRR12015857_1	35.7498	0.0200173	1.22676	12833707
SRR12015857_2	35.2938	0.0139624	1.21852	12833707
SRR12015858_1	35.7179	0.0198398	1.07985	14047128
SRR12015858_2	35.1777	0.0139238	1.07754	14047128
SRR12015859_1	35.7155	0.0199769	1.24726	13336257
SRR12015859_2	35.261	0.0139907	1.24407	13336257
SRR12015860_1	35.8532	0.00783214	0.889923	13041094
SRR12015860_2	35.354	0.0119777	0.87969	13041094
SRR12015861_1	35.7511	0.00772934	0.961695	14063489
SRR12015861_2	35.269	0.0118845	0.958817	14063489
SRR12015862_1	35.8392	0.007824	0.979132	13926139
SRR12015862_2	35.3459	0.0119127	0.977155	13926139
SRR12032944_1	35.6768	0.00399762	0.638271	18627450
SRR12032944_2	31.7919	0.0247495	0.648108	18627450
SRR12032945_1	35.7927	0.00416326	1.43656	11682293
SRR12032945_2	32.583	0.0255611	1.44162	11682293
SRR12032946_1	35.3719	0.00399254	0.52133	14811038
SRR12032946_2	30.5504	0.0248368	0.530321	14811038
SRR12032947_1	34.9892	0.00432645	2.28791	13489535
SRR12032947_2	31.2498	0.0265337	2.28986	13489535
SRR12032948_1	32.9519	0.00404895	1.14211	14008793
SRR12032948_2	31.5732	0.025282	1.18381	14008793
SRR12044609_1	36.2605	0.0018584	0.433175	23048980
SRR12044609_2	36.1618	0.000152832	0.433347	23048980
SRR12044610_1	36.2666	0.00189072	0.451439	21618851
SRR12044610_2	36.0985	0.000158536	0.449018	21618851
SRR12044611_1	36.2731	0.00190242	0.423271	25268413
SRR12044611_2	36.133	0.000155572	0.422186	25268413
SRR12044612_1	36.2611	0.00189377	0.46564	26463446
SRR12044612_2	36.1379	0.000154254	0.465478	26463446
SRR12237019_1	38.5557	0.00179601	5.59e-05	33399980
SRR12237019_2	37.6737	0.000512225	0.00037235	33399980
SRR12267208_1	36.0925	0.00146013	0.0876285	252636284
SRR12267208_2	35.5477	0.024253	0.0871629	252636284
SRR12267209_1	35.83	0.001505	0.119321	246121704
SRR12267209_2	35.2241	0.0353034	0.118776	246121704
SRR12267210_1	36.5442	0.00250511	0.0498971	256094002
SRR12267210_2	36.1728	0.0260058	0.0497165	256094002
SRR12267211_1	36.6381	0.00583785	0.0555545	251083547
SRR12267211_2	36.3869	0.0187814	0.0555709	251083547
SRR12267212_1	36.0282	0.00562558	0.433261	257467444
SRR12267212_2	35.6234	0.0141368	0.431504	257467444
SRR12267213_1	36.2629	0.00507426	0.109422	251246948
SRR12267213_2	35.8971	0.00954618	0.1091	251246948
SRR12267214_1	38.8375	0.00440608	0.00746163	277243955
SRR12267214_2	38.0086	0.0176266	0.00800034	277243955
SRR12267215_1	38.8289	0.00434973	0.00821862	243218777
SRR12267215_2	38.0393	0.0173079	0.00877881	243218777
SRR12267216_1	39.0729	0.00461298	0.0078422	251333435
SRR12267216_2	38.1291	0.0144472	0.00810284	251333435
SRR12267217_1	38.8298	0.00480435	0.00704445	240963111
SRR12267217_2	38.0428	0.0181801	0.0072841	240963111
SRR12267218_1	36.194	0.00207611	0.0944037	268120055
SRR12267218_2	35.7379	0.120306	0.0939427	268120055
SRR12267219_1	36.2288	0.00220183	0.0770895	241221386
SRR12267219_2	35.7506	0.116969	0.0766102	241221386
SRR12267220_1	39.3775	0.0155856	0.00293395	175035609
SRR12267220_2	38.4392	0.00769005	0.00566377	175035609
SRR12267221_1	39.3912	0.0153355	0.00376596	202008109
SRR12267221_2	38.4148	0.00780226	0.00601468	202008109
SRR12267222_1	36.2775	0.00241474	0.235855	148951086
SRR12267222_2	35.7187	0.00176605	0.246127	148951086
SRR12267223_1	36.2933	0.00241489	0.195616	152512006
SRR12267223_2	35.5639	0.00179799	0.202697	152512006
SRR12267224_1	36.3083	0.00242083	0.218374	129774491
SRR12267224_2	35.5631	0.0017751	0.226345	129774491
SRR12267225_1	36.3064	0.0024244	0.251474	158589903
SRR12267225_2	35.3678	0.00178832	0.260016	158589903
SRR1228710_1	34.9185	0.00132996	0	28966598
SRR1228710_2	34.6009	0.00411819	0	28966598
SRR1228711_1	34.802	0.00234207	0	30075221
SRR1228711_2	34.4863	0.00408089	0	30075221
SRR1228712_1	34.9059	0.00236433	0	29249944
SRR1228712_2	34.6255	0.00451895	0	29249944
SRR1228713_1	35.0451	0.00239852	0	30233429
SRR1228713_2	34.8054	0.00448429	0	30233429
SRR1228714_1	35.1378	0.00133719	0	30527468
SRR1228714_2	34.8078	0.00372419	0	30527468
SRR1228723_1	35.0831	0.00137744	0	30140263
SRR1228723_2	34.7834	0.00363691	0	30140263
SRR1228724_1	35.1903	0.0012082	0	30347157
SRR1228724_2	34.8619	0.00398405	0	30347157
SRR1228725_1	35.1566	0.00134325	0	30153385
SRR1228725_2	34.7968	0.00371281	0	30153385
SRR1228726_1	35.018	0.00217508	0	30304466
SRR1228726_2	34.7973	0.00331757	0	30304466
SRR1228727_1	35.0852	0.0014299	0	30153385
SRR1228727_2	34.7241	0.00398873	0	30153385
SRR1228729_1	35.0984	0.00244959	0	29665805
SRR1228729_2	34.8694	0.00460641	0	29665805
SRR1228730_1	34.9348	0.00142285	0	30865721
SRR1228730_2	34.6885	0.0041505	0	30865721
SRR1228731_1	34.705	0.00152848	0	28751015
SRR1228731_2	34.3487	0.0037844	0	28751015
SRR12321654_1	36.1799	0.00420037	0.000438998	18974406
SRR12321654_2	35.9766	0.000460731	0.00174891	18974406
SRR12321655_1	36.2057	0.00410975	0.000302074	18037449
SRR12321655_2	36.0318	0.000479645	0.00127003	18037449
SRR12321656_1	36.1805	0.00466434	0.000570744	18462152
SRR12321656_2	35.9361	0.000485488	0.00198858	18462152
SRR12321657_1	36.1988	0.00409618	0.000432062	17993525
SRR12321657_2	35.9288	0.000473357	0.00202937	17993525
SRR12321658_1	36.2055	0.0044135	0.000467095	18492664
SRR12321658_2	35.9154	0.000467468	0.00178226	18492664
SRR12321659_1	36.2115	0.00414657	0.000371769	19245088
SRR12321659_2	35.9716	0.000473723	0.00193598	19245088
SRR12321660_1	36.2565	0.00412504	0.00031649	19412652
SRR12321660_2	35.9738	0.000464618	0.00122068	19412652
SRR12321661_1	36.1847	0.004299	0.000431231	19544931
SRR12321661_2	36.0001	0.000480728	0.00159836	19544931
SRR12321662_1	36.2398	0.00467719	0.000390841	19625019
SRR12321662_2	35.9919	0.000478739	0.00172363	19625019
SRR12321663_1	36.1873	0.00421152	0.000569272	17598357
SRR12321663_2	35.872	0.000465982	0.00170129	17598357
SRR12321664_1	36.2075	0.00424339	0.000514927	18522697
SRR12321664_2	35.9905	0.00047282	0.00221277	18522697
SRR12321665_1	36.0999	0.00179763	0.31851	26510688
SRR12321665_2	35.8187	0.000572957	0.322455	26510688
SRR12321666_1	36.1486	0.00181912	0.21436	28881836
SRR12321666_2	35.8797	0.000574318	0.216143	28881836
SRR12321667_1	36.0639	0.00178707	0.34019	29453978
SRR12321667_2	35.8488	0.00057106	0.34563	29453978
SRR12321668_1	36.1233	0.00178951	0.273443	28040903
SRR12321668_2	35.9286	0.0005815	0.277689	28040903
SRR12321669_1	36.112	0.0016869	0.32364	24369249
SRR12321669_2	35.9023	0.000507758	0.326552	24369249
SRR12321670_1	35.9372	0.00491815	0.21942	34455416
SRR12321670_2	35.7333	0.000873348	0.238977	34455416
SRR12321671_1	35.9926	0.00488223	0.223208	28928760
SRR12321671_2	35.7052	0.000810721	0.236923	28928760
SRR12321672_1	36.1854	0.00408857	0.000390109	19175150
SRR12321672_2	35.8572	0.000476768	0.00167453	19175150
SRR12321673_1	35.9719	0.00431093	0.171843	26560406
SRR12321673_2	35.754	0.000576878	0.190621	26560406
SRR12321674_1	35.9856	0.00483882	0.180027	28543694
SRR12321674_2	35.7606	0.000817214	0.193484	28543694
SRR12321675_1	35.9286	0.00473407	0.165976	27861963
SRR12321675_2	35.7867	0.000763822	0.187607	27861963
SRR12321676_1	36.0269	0.00176743	0.213969	25291871
SRR12321676_2	35.8583	0.000566585	0.221278	25291871
SRR12321677_1	36.0083	0.00178121	0.246752	32120954
SRR12321677_2	35.8632	0.000571884	0.256693	32120954
SRR12321678_1	36.0559	0.00180134	0.256644	26565360
SRR12321678_2	35.859	0.000577424	0.26128	26565360
SRR12321679_1	36.0359	0.00182726	0.2321	22625808
SRR12321679_2	35.8819	0.00059913	0.23889	22625808
SRR12321680_1	36.0833	0.0017917	0.17018	31733071
SRR12321680_2	35.8931	0.000582242	0.175168	31733071
SRR12341181_1	34.8461	0.000794586	9.8e-07	37674387
SRR12341181_2	34.7403	0.000362299	1.95e-05	37674387
SRR12341182_1	34.4531	0.000711346	3.29e-05	70791143
SRR12341182_2	34.0215	0.000681371	5.74e-05	70791143
SRR12341183_1	34.4584	0.000713595	2.71e-05	74771425
SRR12341183_2	33.9715	0.000674571	7.07e-05	74771425
SRR12341184_1	34.8216	0.000786507	2.12e-06	38392749
SRR12341184_2	34.7204	0.000363499	2.06e-05	38392749
SRR12341185_1	34.421	0.000703037	4.65e-05	70370380
SRR12341185_2	33.9755	0.000670647	7.25e-05	70370380
SRR12341186_1	34.4231	0.000701444	3.73e-05	75653101
SRR12341186_2	33.9369	0.000651488	8.61e-05	75653101
SRR12341187_1	34.841	0.000797295	7.96e-07	38637588
SRR12341187_2	34.7328	0.000383377	1.73e-05	38637588
SRR12341188_1	34.4443	0.000703132	2.41e-05	77085781
SRR12341188_2	34.0204	0.000676663	5.08e-05	77085781
SRR12341189_1	34.4497	0.000703422	2.23e-05	75032959
SRR12341189_2	33.9743	0.000674879	4.79e-05	75032959
SRR12341190_1	34.8263	0.000716848	0	30248742
SRR12341190_2	34.6652	0.000360625	3.09e-05	30248742
SRR12341191_1	34.4851	0.000722798	3.15e-05	87993036
SRR12341191_2	34.1002	0.000693747	6.14e-05	87993036
SRR12341192_1	34.5189	0.000726485	1.98e-05	101462871
SRR12341192_2	34.101	0.000711991	5.39e-05	101462871
SRR12415466_1	37.2048	0.00707507	0.253979	26100839
SRR12415466_2	36.5922	0.00276829	0.26963	26100839
SRR12415467_1	37.0055	0.00688992	0.236364	29377629
SRR12415467_2	36.4758	0.00270383	0.249074	29377629
SRR12415468_1	37.2453	0.00700658	0.250257	27118510
SRR12415468_2	36.623	0.00277034	0.262929	27118510
SRR12415469_1	37.229	0.00699531	0.273044	26849496
SRR12415469_2	36.5328	0.00277416	0.284702	26849496
[truncated: 4,842 more rows]
